# Supplementary material
Source: HighWire-hosted journal article supplement (https://bmjopen.bmj.com/content/12/7/e056045)
Supplement: inline-supplementary-material-2 [file inline-supplementary-material-2.pdf]

Supplementary table 1 Characteristics of included studies

| Author<br>Year  | Grouping<br>(Number of<br>participants)            | Characteristics of participants   |                        |                                                          |                               | Brief<br>description of<br>intervention<br>(Treatment<br>strategy, mode<br>of delivery,<br>treatment<br>provider)                                                                                                   | Outcome measurement of BADL     |                                                                                                         | Results                                                                                                                                                                                                               |
|-----------------|----------------------------------------------------|-----------------------------------|------------------------|----------------------------------------------------------|-------------------------------|---------------------------------------------------------------------------------------------------------------------------------------------------------------------------------------------------------------------|---------------------------------|---------------------------------------------------------------------------------------------------------|-----------------------------------------------------------------------------------------------------------------------------------------------------------------------------------------------------------------------|
|                 |                                                    | Age (year):                       | Gender:<br>Male/Female | Time after<br>stroke onset                               | Disability level<br>of stroke |                                                                                                                                                                                                                     | Measurement tools               | Measurement timepoints                                                                                  |                                                                                                                                                                                                                       |
| Asano<br>2021   | Home-based<br>tele-<br>rehabilitation<br>(n=61)    | mean (range):<br>63.8 (40.8-89.6) | 32/29                  | Within 4 weeks                                           | Not specified                 | Progressive<br>rehabilitation<br>exercises<br>including<br>exercise training<br>and training of<br>functional<br>activities were<br>prescribed by a<br>tele-therapist and<br>performed by<br>patients<br>themselves | Modified Barthel Index<br>(MBI) | At 3 months after post<br>rehabilitation (at treatment<br>endpoints)                                    | (1) Both the home-based<br>intervention group<br>and control group<br>showed<br>improvements in<br>MBI score at<br>treatment endpoint<br><br>(2) There was no<br>between-group<br>difference at<br>treatment endpoint |
|                 | Institution-<br>based<br>intervention<br>(n=63)    | mean (range):<br>64.4 (40.7-86.6) | 33/30                  |                                                          |                               | Centre-based<br>outpatient<br>rehabilitation<br>was provided<br>approximately<br>once or twice a<br>week                                                                                                            |                                 |                                                                                                         |                                                                                                                                                                                                                       |
| Baskett<br>1999 | Home-based<br>self-directed<br>exercises<br>(n=50) | mean (SD):<br>67.8 (11.6)         | 27/23                  | mean (SD):<br>38.6 (28.1) days<br>staying in<br>hospital | Not specified                 | Home-based self-<br>directed<br>exercises aiming<br>at improve the                                                                                                                                                  | Modified Barthel Index<br>(MBI) | (1) At 6 weeks after discharge<br>from hospital<br>(2) At 3 months after<br>discharge from hospital (at | (1) There was no<br>between-group<br>difference either at 6<br>weeks after discharge                                                                                                                                  |

|                |                                                  |                            |       |                                                                                                                       |                                                                                                 | ability of ADL were prescribed by professionals for patients and their caregivers                                                   |                                       | treatment endpoints)                                                                                 | or at treatment endpoint                                                                                                                                                                                                                                                                                                                                                                          |
|----------------|--------------------------------------------------|----------------------------|-------|-----------------------------------------------------------------------------------------------------------------------|-------------------------------------------------------------------------------------------------|-------------------------------------------------------------------------------------------------------------------------------------|---------------------------------------|------------------------------------------------------------------------------------------------------|---------------------------------------------------------------------------------------------------------------------------------------------------------------------------------------------------------------------------------------------------------------------------------------------------------------------------------------------------------------------------------------------------|
|                | Institution-based intervention (n=50)            | mean (SD): 71.7 (9.1)      | 30/20 | mean (SD): 37.5 (36.4) days staying in hospital                                                                       |                                                                                                 | Outpatient or day hospital therapy was provided                                                                                     |                                       |                                                                                                      |                                                                                                                                                                                                                                                                                                                                                                                                   |
| Björkdahl 2006 | Home-based intervention (n=30)                   | median (range): 52 (28-61) | 22/8  | mean (range): 27 (9-58) days staying in acute hospital; mean (range): 66 (24-155) days staying in rehabilitation unit | Not specified                                                                                   | Home-based intervention which was focus on activities in patients' natural context was provided by professionals during home visits | Functional Independence Measure (FIM) | (1) At 3 weeks after discharge (at treatment endpoint)<br>(2) At 3 months<br>(3) At 1 year follow-up | (1) The home-based intervention group showed no improvement in FIM motor sum score from discharge to the 1 year follow-up<br>(2) The control group (day clinic group) showed improvements in FIM motor sum score from discharge to the 1 year follow-up and from 3 months follow-up to 1 year follow-up<br>(3) There was no between-group difference either at treatment endpoint or at follow-up |
|                | Institution-based intervention (n=29)            | median (range): 55 (27-64) | 22/7  | mean (range): 30 (7-70) days staying in acute hospital; mean (range): 61 (20-134) days staying in rehabilitation unit |                                                                                                 | Outpatient therapy which was focus on the training of deficits or components of function was provided in a day clinic               |                                       |                                                                                                      |                                                                                                                                                                                                                                                                                                                                                                                                   |
| Chen 2017      | Home-based telesupervising rehabilitation (n=27) | mean (SD): 66.52 (12.08)   | 18/9  | 14 to 90 days                                                                                                         | National Institute of Health Stroke Scale (NIHSS) scores from 2 to 20 and modified Rankin Scale | Home-based intervention including physical exercises with ADL training and                                                          | Modified Barthel Index (MBI)          | (1) At 12 weeks after randomisation (at treatment endpoint)<br>(2) At 24 weeks after randomisation   | (1) Both the home-based intervention group and control group showed improvements in MBI score at treatment endpoint                                                                                                                                                                                                                                                                               |

|           |                                                     |                          |       |                  |                                                                       |                                                                                                                                                                                                 |                              |                                                                                                    |                                                                                                                    |
|-----------|-----------------------------------------------------|--------------------------|-------|------------------|-----------------------------------------------------------------------|-------------------------------------------------------------------------------------------------------------------------------------------------------------------------------------------------|------------------------------|----------------------------------------------------------------------------------------------------|--------------------------------------------------------------------------------------------------------------------|
|           |                                                     |                          |       |                  | (mRS) scores from 1 to 5                                              | the ETNS therapy was performed by patients themselves with or without caregivers' help under the tele-supervision by professionals                                                              |                              |                                                                                                    | (2) There was no between-group difference either at treatment endpoint or at follow-up                             |
|           | Institution-based intervention (n=27)               | mean (SD): 66.15 (12.33) | 15/12 |                  |                                                                       | Outpatient rehabilitation with the same treatment strategy of home-based intervention was provided by professionals                                                                             |                              |                                                                                                    |                                                                                                                    |
| Chen 2020 | Home-based motor training telerehabilitation (n=26) | mean (SD): 64.19 (9.42)  | 14/12 | Within 1-3 weeks | National Institute of Health Stroke Scale (NIHSS) scores from 2 to 20 | Home-based intervention including physical exercises with ADL training and the ETNS therapy was performed by patients themselves with or without caregivers' help under the tele-supervision by | Modified Barthel Index (MBI) | (1) At 12 weeks after randomisation (at treatment endpoint)<br>(2) At 24 weeks after randomisation | There was no between-group difference in the mean change score of MBI either at treatment endpoint or at follow-up |

|              |                                          |                             |       |                                                    |               |                                                                                                                                                            |                    |                                                     |                                                                              |
|--------------|------------------------------------------|-----------------------------|-------|----------------------------------------------------|---------------|------------------------------------------------------------------------------------------------------------------------------------------------------------|--------------------|-----------------------------------------------------|------------------------------------------------------------------------------|
|              | Institution-based intervention (n=26)    | mean (SD):<br>59.42 (10.00) | 12/14 |                                                    |               | professionals<br>Outpatient rehabilitation with the same treatment strategy of home-based intervention was provided by professionals                       |                    |                                                     |                                                                              |
| Gladman 1993 | Domiciliary-based rehabilitation (n=162) | mean:<br>70                 | 85/77 | Not specified but with description of acute stroke | Not specified | Home-based intervention was performed by professionals during home visits                                                                                  | Barthel Index (BI) | At 6 months after discharge (at treatment endpoint) | There was no between-group difference in the BI score at treatment endpoint  |
|              | Institution-based intervention (n=165)   | mean:<br>70                 | 88/77 |                                                    |               | Outpatient rehabilitation according to the usual practices in Nottingham, where there had hitherto been no domiciliary rehabilitation service was provided |                    |                                                     |                                                                              |
| Gladman 1994 | Domiciliary-based rehabilitation (n=162) | mean:<br>70                 | 85/77 | Not specified but with description of acute stroke | Not specified | Home-based intervention was performed by professionals during home visits                                                                                  | Barthel Index (BI) | At 12 months after discharge                        | There was no between-group difference in the BI score at 12 months follow up |
|              | Institution-based intervention (n=165)   | mean:<br>70                 | 88/77 |                                                    |               | Outpatient rehabilitation                                                                                                                                  |                    |                                                     |                                                                              |

|            |                                        |                        |       |                               |                                                |                                                                                                                                                                                                      |                                             |                                                   |                                                                                                                                                                              |
|------------|----------------------------------------|------------------------|-------|-------------------------------|------------------------------------------------|------------------------------------------------------------------------------------------------------------------------------------------------------------------------------------------------------|---------------------------------------------|---------------------------------------------------|------------------------------------------------------------------------------------------------------------------------------------------------------------------------------|
|            | based intervention (n=165)             | 70                     |       |                               |                                                | rehabilitation according to the usual practices in Nottingham, where there had hitherto been no domiciliary rehabilitation service was provided                                                      |                                             |                                                   |                                                                                                                                                                              |
| Han 2020   | Home-based reablement programme (n=12) | mean (SD): 70.8 (6.5)  | 8/4   | mean (SD): 22.8 (17.7) months | modified Rankin Scale (mRS) scores from 2 to 4 | Home-based intervention of ADL training was provided by professionals during home visits                                                                                                             | Barthel Index (BI))                         | At 6 weeks (at treatment endpoint)                | (1) There was no between-group difference in the change score of BI at treatment endpoint<br>(2) There was no between-group difference in the BI score at treatment endpoint |
|            | Institution-based intervention (n=14)  | mean (SD): 65.4 (16.7) | 9/5   | mean (SD): 53.5 (43.7) months |                                                | Conventional rehabilitation including 30 minutes of occupational therapy and 30 minutes of physical therapy for training motor and cognitive functions was provided in the hospital for twice a week |                                             |                                                   |                                                                                                                                                                              |
| Hesse 2011 | Intermittent high-intensity            | mean (SD): 62.4 (11.3) | 13/12 | mean (SD): 12.9 (2.3) weeks   | Patients could walk                            | (1) An intermittent                                                                                                                                                                                  | Rivermead Activities of Daily Living scales | (1) At every second month from the discharge from | (1) Both the home-based intervention group                                                                                                                                   |

|                                           |                       |       |  |                             |                                                                                                                                                                                                                        |                                                                                                                                                                                                                                             |  |                                                                                                                                                                                                                                                                                                                                                    |                                                                                                                                                                                                                                           |
|-------------------------------------------|-----------------------|-------|--|-----------------------------|------------------------------------------------------------------------------------------------------------------------------------------------------------------------------------------------------------------------|---------------------------------------------------------------------------------------------------------------------------------------------------------------------------------------------------------------------------------------------|--|----------------------------------------------------------------------------------------------------------------------------------------------------------------------------------------------------------------------------------------------------------------------------------------------------------------------------------------------------|-------------------------------------------------------------------------------------------------------------------------------------------------------------------------------------------------------------------------------------------|
| home-based physiotherapy programme (n=25) |                       |       |  |                             | independently within their home – technical aids were allowed – but they still needed help with personal hygiene, dressing, feeding and stair climbing, resulting in a Barthel Index (BI, 0–100) ranging from 55 to 80 | high-intensity home-based physiotherapy programme was provided by professional during home visits (2) Self-therapy programme consisting of various stretching, strengthening and motor tasks was performed by patients and their caregivers |  | inpatient rehabilitation to home during the 12-months study period (at 2 months after discharge; at 4 months after discharge; at 6 months after discharge; at 8 months after discharge; at 10 months after discharge; at 12 months after discharge which was at treatment endpoint) (2) At 15 months after discharge (at 3 months after treatment) | and control group showed improvements in Rivermead Activities of Daily Living scales (self-care) score over time (2) There were no between-group differences in Rivermead Activities of Daily Living scales (self-care) score at any time |
| Institution-based intervention (n=25)     | mean (SD): 61.9 (9.4) | 14/11 |  | mean (SD): 14.8 (3.9) weeks |                                                                                                                                                                                                                        | Regular physiotherapy programme which treatment strategy was similar to the home-based intervention, consisting of two weekly 30 to 45 minutes physiotherapy                                                                                |  |                                                                                                                                                                                                                                                                                                                                                    |                                                                                                                                                                                                                                           |

|              |                                                                        |                             |       |                 |                                                                                                                                                         |                                                                                                       |                    |                                                                           |                                                                                                                                                                                                                                                                                                                                                       |
|--------------|------------------------------------------------------------------------|-----------------------------|-------|-----------------|---------------------------------------------------------------------------------------------------------------------------------------------------------|-------------------------------------------------------------------------------------------------------|--------------------|---------------------------------------------------------------------------|-------------------------------------------------------------------------------------------------------------------------------------------------------------------------------------------------------------------------------------------------------------------------------------------------------------------------------------------------------|
|              |                                                                        |                             |       |                 |                                                                                                                                                         | sessions was provided by a physiotherapist in the private unit                                        |                    |                                                                           |                                                                                                                                                                                                                                                                                                                                                       |
| Hofstad 2014 | Early supported discharge to home with home-based intervention (n=104) | mean (range): 72.00 (27-92) | 61/43 | Within 7 days   | NIHSS score of 2-26, and NIHSS <2 with modified Rankin Scale (mRS) score $\geq 2$                                                                       | Home-based intervention was provided by a multi-disciplinary community health team during home visits | Barthel Index (BI) | (1) At 3 months follow-up<br>(2) At 6 months follow-up                    | (1) The home-based intervention group showed improvement in BI score at 3 months follow-up, and a trend for improvement at 6 months follow-up<br>(2) The institution-based intervention group showed improvement in BI score at 3 months and 6 months follow-up<br>(3) There was no between-group difference either at 3 months or 6 months follow-up |
|              | Institution-based intervention (n=103)                                 | mean (range): 70.61 (29-91) | 56/47 |                 |                                                                                                                                                         | Rehabilitation treatment was provided by professionals in a community day unit                        |                    |                                                                           |                                                                                                                                                                                                                                                                                                                                                       |
| Kalra 2000   | Domiciliary stroke care (n=149)                                        | median (IQR): 77.7 (67-83)  | 81/68 | Within 72 hours | Moderately severe stroke (patients with persistent neurological deficit affecting continence, mobility, and ability to look after themselves, requiring | Home-based intervention was provided by a specialist stroke team during home visits                   | Barthel Index (BI) | (1) At 3 months after stroke onset<br>(2) At 12 months after stroke onset | (1) A favourable outcome of BI score 15–20 at 3 months was seen in 82% of patients in the stroke-unit group compared with 70% of patients in the stroke team and 74% of patients in the domiciliary-care group                                                                                                                                        |
|              | Institution-based intervention (in stroke unit) (n=148)                | median (IQR): 75 (72-84)    | 79/69 |                 |                                                                                                                                                         | Coordinated treatment was provided by a multidisciplinary team in the stroke                          |                    |                                                                           |                                                                                                                                                                                                                                                                                                                                                       |

|              |                                                          |                            |       |                               |                              |                                                                                                                                                                               |                                       |                           |                                                                                                                                                                                                                                                         |
|--------------|----------------------------------------------------------|----------------------------|-------|-------------------------------|------------------------------|-------------------------------------------------------------------------------------------------------------------------------------------------------------------------------|---------------------------------------|---------------------------|---------------------------------------------------------------------------------------------------------------------------------------------------------------------------------------------------------------------------------------------------------|
|              | Institution-based intervention (in general ward) (n=150) | median (IQR): 77.3 (71-83) | 74/76 |                               | multidisciplinary treatment) | unit<br>Day-to-day treatment was prescribed by a specialist team and was provided by staff in the general ward                                                                |                                       |                           | (2) There was no significant change in BI score in any groups between 3 and 12 months follow ups                                                                                                                                                        |
| Özdemir 2001 | Home-based rehabilitation (n=30)                         | 48-80                      | 19/11 | mean (range): 36 (15-75) days | Not specified                | Home-based interventions including exercises and provision of splints, orthoses and devices were prescribed by professionals and was performed by patients and family members | Functional Independence Measure (FIM) | At treatment endpoint     | (1) The institution-based intervention group showed improvement in FIM score at treatment endpoint<br>(2) The institution-based intervention group showed greater improvement in FIM score than the home-based intervention group at treatment endpoint |
|              | Institution-based intervention (n=30)                    |                            | 21/9  | mean (range): 41 (10-82) days |                              | Intense multidisciplinary rehabilitation services including therapeutical and neuromuscular exercises with occupational therapy were provided in the rehabilitation clinic    |                                       |                           |                                                                                                                                                                                                                                                         |
| Pandian      | Family-led,                                              | mean (SD):                 | 61/43 | Within 1 month                | Patients with                | Home-based                                                                                                                                                                    | modified Rankin Scale                 | (1) At 3 months follow up | (1) 26 (29%) patients had                                                                                                                                                                                                                               |



|              |                                                                            |                      |       |                                              |                                                                                                                                                         |                                                                                                                                                                                                               |                              |                             |                                                                                                                                                                                                                                                |
|--------------|----------------------------------------------------------------------------|----------------------|-------|----------------------------------------------|---------------------------------------------------------------------------------------------------------------------------------------------------------|---------------------------------------------------------------------------------------------------------------------------------------------------------------------------------------------------------------|------------------------------|-----------------------------|------------------------------------------------------------------------------------------------------------------------------------------------------------------------------------------------------------------------------------------------|
| 2015         | trained caregiver-delivered, home-based rehabilitation intervention (n=50) | 60 (13)              |       |                                              | residual disability (defined as requiring help from another person for everyday activities)                                                             | interventions including positioning, transfers, mobility, task-orientated training (particularly walking, upper-limb, and self-care tasks) prescribed by professionals were performed by patients' caregivers | (mRS)                        | (2) At 6 months follow up   | a good outcome (mRS 0–2) and 64 (71%) a poor outcome (mRS 3–6) at 3 months follow up<br>(2) 35 (39%) had a good outcome and 54 (61%) had a poor outcome at 6 months follow up                                                                  |
|              | Institution-based intervention (n=54)                                      |                      |       |                                              |                                                                                                                                                         | Routine care was provided on an in- or out-patient basis                                                                                                                                                      |                              |                             |                                                                                                                                                                                                                                                |
| Redzuan 2012 | Video-based therapy programme at home (n=44)                               | mean (SD): 63.7 (12) | 21/23 | mean (SD): 12.9 (8) days staying in hospital | 10 patients with mild stroke (NIHSS score < 6); 26 patients with moderate stroke (NIHSS score = 6-14); 8 patients with severe stroke (NIHSS score > 14) | Home-based interventions including exercises and training of activities of daily living were prescribed by professionals and were performed by patients and/or their caregivers                               | Modified Barthel Index (MBI) | At 3 months after discharge | (1) More patients in the home-based intervention group (60%) had improved MBI scores compared with patients in the control group (45.7%)<br>(2) Both the home-based intervention group and control group showed improvements in MBI score at 3 |
|              | Institution-                                                               | mean (SD):           | 31/15 | mean (SD):                                   | 17 patients with                                                                                                                                        | Outpatient                                                                                                                                                                                                    |                              |                             |                                                                                                                                                                                                                                                |

|               |                                           |                            |       |                                                        |                                                                                                                                        |                                                                                                                                           |                                                                                                              |                       |                                                                                                                                                                                       |
|---------------|-------------------------------------------|----------------------------|-------|--------------------------------------------------------|----------------------------------------------------------------------------------------------------------------------------------------|-------------------------------------------------------------------------------------------------------------------------------------------|--------------------------------------------------------------------------------------------------------------|-----------------------|---------------------------------------------------------------------------------------------------------------------------------------------------------------------------------------|
|               | based intervention (n=46)                 | 59.4 (11)                  |       | 10.9 (7) days staying in hospital                      | mild stroke (NIHSS score < 6); 24 patients with moderate stroke (NIHSS score = 6-14); 5 patients with severe stroke (NIHSS score > 14) | therapy for 1 hour each for physical and occupational therapy was provided weekly                                                         |                                                                                                              |                       | months follow up                                                                                                                                                                      |
| Roderick 2001 | Domiciliary rehabilitation service (n=66) | mean (range): 78.3 (62-91) | 33/33 | median (IQR): 50 (36.8, 85.3) days staying in hospital | Not specified                                                                                                                          | Home-based intervention was provided by a physiotherapist and an occupational therapist                                                   | Barthel Index (BI)                                                                                           | At 6 months follow up | (1) Both the home-based intervention group and control group showed improvements in BI score at 6 months follow up<br>(2) There was no between-group difference at 6 months follow up |
|               | Institution-based intervention (n=74)     | mean (range): 79.6 (60-95) | 32/42 | median (IQR): 48 (30, 80) days staying in hospital     |                                                                                                                                        | Therapy was provided by multi-disciplinary teams in day hospitals                                                                         |                                                                                                              |                       |                                                                                                                                                                                       |
| Taule 2015    | Early supported discharge at home (n=53)  | median (range): 74 (42-92) | 29/24 | Within 1-7 days                                        | 2-26 in the NIHSS score                                                                                                                | Home-based intervention was mainly directed towards ADLs, and function-specific treatment was also provided by a professional during home | (1) Assessment of Motor and Process Skills-motor scale (AMPS-motor scale)<br>(2) modified Rankin Scale (mRS) | At 3 months follow-up | No within-group or between-group statistical analysis                                                                                                                                 |

|              |                                                                              |                          |       |          |                                                                                                                                                                                 |                                                                                                                                                                                                                                                               |                    |                         |                                                            |
|--------------|------------------------------------------------------------------------------|--------------------------|-------|----------|---------------------------------------------------------------------------------------------------------------------------------------------------------------------------------|---------------------------------------------------------------------------------------------------------------------------------------------------------------------------------------------------------------------------------------------------------------|--------------------|-------------------------|------------------------------------------------------------|
|              |                                                                              |                          |       |          |                                                                                                                                                                                 | visits                                                                                                                                                                                                                                                        |                    |                         |                                                            |
|              | Institution-based intervention (n=50)                                        | mean (range): 72 (29-90) | 29/21 |          |                                                                                                                                                                                 | Therapy which focused on specific functions and on specific instrumental ADL activities was provided by the municipal health-care team in a day unit                                                                                                          |                    |                         |                                                            |
| Thorsén 2005 | Early supported discharge (ESD) with continued rehabilitation at home (n=30) | mean: 71                 | 15/15 | 5-7 days | Patients with mild to moderate impairments (independence in feeding and continence according to Katz index of ADL with impaired motor capacity according to the Lindmark scale) | The home-based intervention emphasizing a task- and context-oriented approach, which implies that the patient performs guided, supervised, or self-directed activities in a functional and familiar context, was provided by professionals during home visits | Barthel Index (BI) | At 5 years after stroke | There was no between-group difference at 5 years follow up |
|              | Institution-based intervention (n=24)                                        |                          | 14/10 |          |                                                                                                                                                                                 | Routine rehabilitation service was provided in the hospital, day                                                                                                                                                                                              |                    |                         |                                                            |

|               |                                                                              |                            |               |          |                                                                                                                                                                         |                                                                                                                                                                                                                                                               |                    |                           |                                                              |
|---------------|------------------------------------------------------------------------------|----------------------------|---------------|----------|-------------------------------------------------------------------------------------------------------------------------------------------------------------------------|---------------------------------------------------------------------------------------------------------------------------------------------------------------------------------------------------------------------------------------------------------------|--------------------|---------------------------|--------------------------------------------------------------|
|               |                                                                              |                            |               |          |                                                                                                                                                                         | care, and/or outpatient care                                                                                                                                                                                                                                  |                    |                           |                                                              |
| von Koch 2001 | Early supported discharge (ESD) with continued rehabilitation at home (n=39) | Not specified              | Not specified | 5-7 days | Patients with moderate impairments (independence in feeding and continence according to Katz index of ADL with impaired motor capacity according to the Lindmark scale) | The home-based intervention emphasizing a task- and context-oriented approach, which implies that the patient performs guided, supervised, or self-directed activities in a functional and familiar context, was provided by professionals during home visits | Barthel Index (BI) | At 12 months after stroke | There was no between-group difference at 12 months follow up |
|               | Institution-based intervention (n=38)                                        |                            |               |          |                                                                                                                                                                         | Routine rehabilitation service was provided in the hospital, day care, and/or outpatient care                                                                                                                                                                 |                    |                           |                                                              |
| von Koch 2000 | Early supported discharge (ESD) with continued rehabilitation at home        | median (range): 72 (49-84) | 22/18         | 5-7 days | Patients with moderate impairments (independence in feeding and continence according to Katz                                                                            | The home-based intervention emphasizing a task- and context-oriented approach, which implies that the                                                                                                                                                         | Barthel Index (BI) | At 6 months after stroke  | There was no between-group difference at 6 months follow up  |

|                      |                                                                              |                            |       |          |                                                                                                                                                                         |                                                                                                                                                                                                                                            |                    |                          |                                                             |
|----------------------|------------------------------------------------------------------------------|----------------------------|-------|----------|-------------------------------------------------------------------------------------------------------------------------------------------------------------------------|--------------------------------------------------------------------------------------------------------------------------------------------------------------------------------------------------------------------------------------------|--------------------|--------------------------|-------------------------------------------------------------|
|                      | (n=40)                                                                       |                            |       |          | index of ADL with impaired motor capacity according to the Lindmark scale)                                                                                              | patient performs guided, supervised, or self-directed activities in a functional and familiar context, was provided by professionals during home visits                                                                                    |                    |                          |                                                             |
|                      | Institution-based intervention (n=38)                                        | median (range): 73 (49-89) | 21/17 |          |                                                                                                                                                                         | Routine rehabilitation service was provided in the hospital, day care, and/or outpatient care                                                                                                                                              |                    |                          |                                                             |
| Widén Holmqvist 1998 | Early supported discharge (ESD) with continued rehabilitation at home (n=41) | mean (SD): 70.8 (7.6)      | 22/19 | 5-7 days | Patients with moderate impairments (independence in feeding and continence according to Katz index of ADL with impaired motor capacity according to the Lindmark scale) | The home-based intervention emphasizing a task- and context-oriented approach, which implies that the patient performs guided, supervised, or self-directed activities in a functional and familiar context, was provided by professionals | Barthel Index (BI) | At 3 months after stroke | There was no between-group difference at 3 months follow up |

|             |                                                              |                               |       |                                                                          |                                             |                                                                                                                       |                    |                                                                                        |                                                                                                                                                                                                                                                                  |
|-------------|--------------------------------------------------------------|-------------------------------|-------|--------------------------------------------------------------------------|---------------------------------------------|-----------------------------------------------------------------------------------------------------------------------|--------------------|----------------------------------------------------------------------------------------|------------------------------------------------------------------------------------------------------------------------------------------------------------------------------------------------------------------------------------------------------------------|
|             |                                                              |                               |       |                                                                          |                                             | during home visits                                                                                                    |                    |                                                                                        |                                                                                                                                                                                                                                                                  |
|             | Institution-based intervention (n=40)                        | mean (SD):<br>72.6 (8.9)      | 22/18 |                                                                          |                                             | Routine rehabilitation service was provided in the hospital, day care, and/or outpatient care                         |                    |                                                                                        |                                                                                                                                                                                                                                                                  |
| Young 1992  | Home physiotherapy (n=63)                                    | median (range):<br>70 (60-89) | 38/25 | Not specified but with description of patients with a new stroke episode | Not specified                               | Home-based intervention was provided by one of five experienced community physiotherapists during home visits         | Barthel Index (BI) | At 6 months after discharge                                                            | (1) Both the home-based intervention group and control group showed improvements in BI score at 6 months follow up<br>(2) The home-based intervention showed greater improvement in BI score than the institution-based intervention group at 6 months follow up |
|             | Institution-based intervention (n=61)                        | median (range):<br>72 (60-88) | 31/30 |                                                                          |                                             | Rehabilitation was provided in one of four geriatric day hospitals twice a week                                       |                    |                                                                                        |                                                                                                                                                                                                                                                                  |
| Barzel 2015 | Home-based constraint-induced movement therapy (CIMT) (n=85) | mean (SD):<br>62.55 (13.73)   | 51/34 | mean (SD):<br>56.57 (47.36)<br>months                                    | Minor: n=68<br>Moderate: n=16<br>Major: n=1 | Home CIMT which was relevant to everyday life was performed with the coaching by non-professional (eg, family member) | Barthel Index (BI) | (1) At 4 weeks after intervention (at treatment endpoint)<br>(2) At 6 months follow-up | (1) The home-based intervention group showed improvement in BI score at treatment endpoint relative to baseline, but showed no improvement at 6 months follow-up<br>(2) The usual care group                                                                     |
|             | Usual care                                                   | mean (SD):                    | 43/28 | mean (SD):                                                               | Minor: n=54                                 | Traditional                                                                                                           |                    |                                                                                        |                                                                                                                                                                                                                                                                  |

|                |                                                   |                    |       |                                                                         |                                                                                      |                                                                                                                                                                                                                           |                    |                                              |                                                                                                                                                                                                                                                      |
|----------------|---------------------------------------------------|--------------------|-------|-------------------------------------------------------------------------|--------------------------------------------------------------------------------------|---------------------------------------------------------------------------------------------------------------------------------------------------------------------------------------------------------------------------|--------------------|----------------------------------------------|------------------------------------------------------------------------------------------------------------------------------------------------------------------------------------------------------------------------------------------------------|
|                | (n=71)                                            | 65.30 (12.63)      |       | 45.65 (57.69) months                                                    | Moderate: n=16<br>Major: n=1                                                         | physiotherapy and occupational therapy were performed by professionals either in a patient's home or in a therapeutic practice                                                                                            |                    |                                              | showed no improvement in BI score either at treatment endpoint or at 6 months follow-up<br>(3) There was no between-group difference at 6 months follow-up                                                                                           |
| Chaiyawat 2012 | Home-based individual's exercise programme (n=30) | mean (SD): 67 (10) | 14/16 | Patients were screened for eligibility around 3 days after stroke onset | mean (SD): 16.4 (4.1) in the National Institute of Health Stroke Scale (NIHSS) score | Home-based individual's exercise programme included exercises and ADL practice was performed by a professional during home visits, with provision of standard materials on an audiovisual CD of rehabilitation procedures | Barthel Index (BI) | At 2 years after discharge from the hospital | (1) Both the home-based intervention group and the usual care group showed improvement in BI score at 2 years follow-up<br>(2) The home-based intervention group showed significantly greater improvement than usual care group at 2 years follow-up |
|                | Usual care (n=30)                                 | mean (SD): 66 (11) | 13/17 |                                                                         | mean (SD): 17.8 (3.9) in the NIHSS score                                             | Might include outpatient rehabilitation and instruction for home rehabilitation at the discretion of                                                                                                                      |                    |                                              |                                                                                                                                                                                                                                                      |

|                |                                                                  |                         |       |                               |                                                                                      |                                                                                                                                                                                                                           |                    |                                                                                                                                                  |                                                                                                                                                                                                      |
|----------------|------------------------------------------------------------------|-------------------------|-------|-------------------------------|--------------------------------------------------------------------------------------|---------------------------------------------------------------------------------------------------------------------------------------------------------------------------------------------------------------------------|--------------------|--------------------------------------------------------------------------------------------------------------------------------------------------|------------------------------------------------------------------------------------------------------------------------------------------------------------------------------------------------------|
|                |                                                                  |                         |       |                               |                                                                                      | their physicians                                                                                                                                                                                                          |                    |                                                                                                                                                  |                                                                                                                                                                                                      |
| Chaiyawat 2009 | Home-based individual's exercise programme (n=30)                | mean (SD): 67 (10)      | 14/16 | Not specified                 | mean (SD): 16.4 (4.1) in the National Institute of Health Stroke Scale (NIHSS) score | Home-based individual's exercise programme included exercises and ADL practice was performed by a professional during home visits, with provision of standard materials on an audiovisual CD of rehabilitation procedures | Barthel Index (BI) | At 3 months after discharge from the hospital                                                                                                    | (1) The home-based intervention group showed improvement in BI score at 3 months<br>(2) The home-based intervention group showed significantly greater improvement than usual care group at 3 months |
|                | Usual care (n=30)                                                | mean (SD): 66 (11)      | 13/17 |                               | mean (SD): 17.8 (3.9) in the NIHSS score                                             | Might include outpatient rehabilitation and instruction for home rehabilitation at the discretion of their physicians                                                                                                     |                    |                                                                                                                                                  |                                                                                                                                                                                                      |
| Chen 2021      | Nurse-guided home-based rehabilitation exercise programme (n=59) | mean (SD): 55.41 (6.78) | 41/18 | mean (SD): 3.41 (0.79) months | Not specified                                                                        | Environmental modification of home and exercise programme mainly including strengthening training of the                                                                                                                  | Barthel Index (BI) | (1) At 3 months after initiation of rehabilitation<br>(2) At 6 months after initiation of rehabilitation<br>(3) At 12 months after initiation of | (1) The home-based intervention group showed significantly higher BI score than usual care group at 3 months, 6 months and 12 months after initiation of                                             |



|           |                                               |                         |       |                                             |                                         |                                                                                                                                                                                                                 |                              |                                                                                                                            |                                                                                                                                                                                                                                                                   |
|-----------|-----------------------------------------------|-------------------------|-------|---------------------------------------------|-----------------------------------------|-----------------------------------------------------------------------------------------------------------------------------------------------------------------------------------------------------------------|------------------------------|----------------------------------------------------------------------------------------------------------------------------|-------------------------------------------------------------------------------------------------------------------------------------------------------------------------------------------------------------------------------------------------------------------|
|           |                                               |                         |       |                                             |                                         | lower muscle groups were provided by a nurse during home visits                                                                                                                                                 |                              | rehabilitation (at treatment endpoint)                                                                                     | rehabilitation (2) The home-based intervention group showed significantly greater improvement than usual care group at 3 months, 6 months and 12 months after initiation of rehabilitation                                                                        |
|           | Usual care (n=62)                             | mean (SD): 56.41 (6.13) | 44/18 | mean (SD): 3.23 (0.82) months               |                                         | Conventional rehabilitation included issuing a rehabilitation manual for stroke, performing telephonic follow-up and completing follow-up medical appointments for assessment of recovery at 3, 6 and 12 months |                              |                                                                                                                            |                                                                                                                                                                                                                                                                   |
| Deng 2020 | Integrated transitional care programme (n=49) | mean (SD): 60.7 (17.8)  | 32/17 | mean (SD): 15 (6) days' stay in stroke unit | mean (SD): 8.9 (4.9) in the NIHSS score | Stroke rehabilitation was provided by a multidisciplinary poststroke consultation team during home visits                                                                                                       | Modified Barthel Index (MBI) | (1) At 4 weeks after discharge from stroke unit<br>(2) At 8 weeks after discharge from stroke unit (at treatment endpoint) | (1) The home-based intervention group showed significantly higher MBI score than usual care group at 4 weeks and 8 weeks after discharge from stroke unit<br>(2) The home-based intervention group showed significantly greater improvement than usual care group |
|           | Usual care (n=49)                             | mean (SD): 62.9 (20.5)  | 30/19 | mean (SD): 17 (9) days' stay in stroke unit | mean (SD): 9.1 (4.5) in the NIHSS score | Usual post-discharge care consisted of detection and                                                                                                                                                            |                              |                                                                                                                            |                                                                                                                                                                                                                                                                   |

|              |                                                                              |                             |               |               |                                                                                        |                                                                                                        |                    |                                                                   |                                                                                                                                                                                                                                                                          |
|--------------|------------------------------------------------------------------------------|-----------------------------|---------------|---------------|----------------------------------------------------------------------------------------|--------------------------------------------------------------------------------------------------------|--------------------|-------------------------------------------------------------------|--------------------------------------------------------------------------------------------------------------------------------------------------------------------------------------------------------------------------------------------------------------------------|
|              |                                                                              |                             |               |               |                                                                                        | control of potential risk factors and medication therapy based on secondary stroke prevention strategy |                    |                                                                   | at 4 weeks and 8 weeks after discharge from stroke unit                                                                                                                                                                                                                  |
| Duncan 1998  | Therapist-supervised home-based exercise programme (n=10)                    | mean (SD): 67.3 (9.6)       | Not described | 30 to 90 days | Minimal or moderately impaired sensorimotor function (Fugl-Meyer Motor Score 40 to 90) | Home-based exercises were provided by a physical therapist during home visits                          | Barthel Index (BI) | At 12 weeks after the baseline assessment (at treatment endpoint) | There was no between-group difference at 12 weeks follow-up                                                                                                                                                                                                              |
|              | Usual care (n=10)                                                            | mean (SD): 67.8 (7.2)       |               |               |                                                                                        | Usual care included home health visits and outpatient therapy                                          |                    |                                                                   |                                                                                                                                                                                                                                                                          |
| Hofstad 2014 | Early supported discharge (ESD) to home with home-based intervention (n=104) | mean (range): 72.00 (27-92) | 61/43         | Within 7 days | NIHSS score of 2-26, and NIHSS <2 with modified Rankin Scale (mRS) score $\geq 2$      | Home-based intervention was provided by a multi-disciplinary community health team during home visits  | Barthel Index (BI) | (1) At 3 months follow-up<br>(2) At 6 months follow-up            | (1) The home-based intervention group showed improvement in BI score at 3 months follow-up, and a trend for improvement at 6 months follow-up<br>(2) The usual care group showed no improvement in BI score either at 3 months or 6 months follow-up<br>(3) There was no |
|              | Usual care (n=99)                                                            | mean (range): 74.19 (32-98) | 52/47         |               |                                                                                        | Usual care without any intervention from the study                                                     |                    |                                                                   |                                                                                                                                                                                                                                                                          |

|              |                                              |                         |         |                |                                          |                                                                                                                                                                 |                    |                                                                            |                                                                                               |
|--------------|----------------------------------------------|-------------------------|---------|----------------|------------------------------------------|-----------------------------------------------------------------------------------------------------------------------------------------------------------------|--------------------|----------------------------------------------------------------------------|-----------------------------------------------------------------------------------------------|
|              |                                              |                         |         |                |                                          |                                                                                                                                                                 |                    |                                                                            | between-group difference either at 3 months or 6 months follow-up                             |
| Lincoln 2004 | Home-based intervention (n=189)              | mean (SD): 72.8 (11.4)  | 94/95   | Within 2 years | Not described                            | Home-based intervention including physiotherapy, occupational therapy, speech and language therapy were provided by a multidisciplinary team during home visits | Barthel Index (BI) | At 6 months after randomization                                            | There was no between-group difference in BI score at 6 months after randomization             |
|              | Usual care (n=232)                           | mean (SD): 71.2 (11.5)  | 128/104 |                |                                          | Routine rehabilitation services included day hospitals, outpatients departments and social services occupational therapy                                        |                    |                                                                            |                                                                                               |
| Lindley 2017 | Family-led home-based rehabilitation (n=623) | mean (SD): 57.5 (12.92) | 421/202 | Within 1 month | mean (SD): 10.1 (4.9) in the NIHSS score | (1) Family rehabilitation training including information provision, joint goal setting, carer training, and                                                     | Barthel Index (BI) | (1) At 3 months after randomization<br>(2) At 6 months after randomization | There was no between-group difference in BI score either at 3 months or at 6 months follow-up |

|           |                                                                       |                         |         |         |                                                                     |                                                                                                                                                                                                                |                    |                                                                     |                                                                                                                                       |
|-----------|-----------------------------------------------------------------------|-------------------------|---------|---------|---------------------------------------------------------------------|----------------------------------------------------------------------------------------------------------------------------------------------------------------------------------------------------------------|--------------------|---------------------------------------------------------------------|---------------------------------------------------------------------------------------------------------------------------------------|
|           |                                                                       |                         |         |         |                                                                     | task-specific training was performed by a professional during home visits<br>(2) Home-based intervention for patients was mediated by caregivers                                                               |                    |                                                                     |                                                                                                                                       |
|           | Usual care (n=627)                                                    | mean (SD): 58.0 (14.21) | 416/211 |         | mean (SD): 9.6 (4.8) in the NIHSS score                             | Usual care consisted of some therapy, in the form of assessment and treatment by a physiotherapist, during hospital stay, with post-discharge care varying from no therapy to some outpatient therapy sessions |                    |                                                                     |                                                                                                                                       |
| Mayo 2000 | Tailor-made home programme with prompt discharge from hospital (n=58) | mean (SD): 70.3 (12.7)  | 37/21   | 28 days | mean (SD): 8.9 (2.2) in the Canadian Neurological Scale (CNS) score | Home-based intervention including physical therapy, occupational therapy, speech therapy, and                                                                                                                  | Barthel Index (BI) | (1) At 1 month (at treatment endpoint)<br>(2) At 3 months follow-up | (1) The home-based intervention group showed improvement in BI score at 1 month and at 3 months follow-up<br>(2) The usual care group |

|                |                                        |                          |       |                                                    |                                                                     |                                                                                                                                                                                                                                                               |                              |                      |                                                                                                                                                             |
|----------------|----------------------------------------|--------------------------|-------|----------------------------------------------------|---------------------------------------------------------------------|---------------------------------------------------------------------------------------------------------------------------------------------------------------------------------------------------------------------------------------------------------------|------------------------------|----------------------|-------------------------------------------------------------------------------------------------------------------------------------------------------------|
|                |                                        |                          |       |                                                    |                                                                     | dietary consultation was provided by a multidisciplinary team during home visits                                                                                                                                                                              |                              |                      | showed improvement in BI score at 1 month and at 3 months follow-up<br>(3) There was no between-group difference either at 1 month or at 3 months follow-up |
|                | Usual care (n=56)                      | mean (SD): 69.6 (12.7)   | 40/16 |                                                    | mean (SD): 8.9 (2.1) in the Canadian Neurological Scale (CNS) score | Usual care comprised a range of services, including PT, OT and ST as requested by the patient's care provider and offered through extended acute-care hospital stay; inpatient or outpatient rehabilitation; or home care via local community health clinics. |                              |                      |                                                                                                                                                             |
| Rasmussen 2016 | Early home-based rehabilitation (n=38) | median (IQR): 78 (72-84) | 16/22 | Not specified but with description of acute stroke | median (IQR): 44 (37-46) in the Scandinavian Stroke Scale Score     | Home-based interventions including physical exercises and training of activities of daily living were provided by a multidisciplinary team during                                                                                                             | Modified Barthel Index (MBI) | At 90 days follow-up | There was no between-group difference in MBI score at 90 days follow-up                                                                                     |

|              |                                                      |                            |       |               |                                                                                                           |                                                                                                                                                                                           |                                       |                                                                            |                                                                                      |
|--------------|------------------------------------------------------|----------------------------|-------|---------------|-----------------------------------------------------------------------------------------------------------|-------------------------------------------------------------------------------------------------------------------------------------------------------------------------------------------|---------------------------------------|----------------------------------------------------------------------------|--------------------------------------------------------------------------------------|
|              | Usual care (n=33)                                    | median (IQR): 79 (71-85)   | 14/19 |               | median (IQR): 42 (31-46) in the Scandinavian Stroke Scale Score                                           | home visits<br>Usual care was provided by professionals in the stroke unit and after hospital discharge                                                                                   |                                       |                                                                            |                                                                                      |
| Santana 2017 | Early home-supported discharge (EHSD) service (n=95) | mean (range): 67.5 (40-84) | 47/48 | Not specified | Had some residual disability in the form of an initial Functional Independence Measure (FIM) of up to 100 | Home-based interventions including physiotherapy, occupational therapy and psychology which was focused on training of daily activities were provided by professionals during home visits | Functional Independence Measure (FIM) | (1) At 2 months after randomisation<br>(2) At 6 months after randomisation | There was no between-group difference in FIM score either at 2 months or at 6 months |
|              | Usual care (n=95)                                    | mean (range): 66.5 (35-84) | 54/41 |               |                                                                                                           | Usual care included standard care in the stroke unit and standard rehabilitation available in the region following discharge including no further rehabilitation, further                 |                                       |                                                                            |                                                                                      |

|             |                                                |                            |       |                 |                         |                                                                                                                                                                                                                       |                                                                                                              |                                 |                                                                                                             |
|-------------|------------------------------------------------|----------------------------|-------|-----------------|-------------------------|-----------------------------------------------------------------------------------------------------------------------------------------------------------------------------------------------------------------------|--------------------------------------------------------------------------------------------------------------|---------------------------------|-------------------------------------------------------------------------------------------------------------|
|             |                                                |                            |       |                 |                         | ambulatory rehabilitation, inpatient rehabilitation                                                                                                                                                                   |                                                                                                              |                                 |                                                                                                             |
| Taule 2015  | Early supported discharge (ESD) at home (n=53) | median (range): 74 (42-92) | 29/24 | Within 1-7 days | 2-26 in the NIHSS score | Home-based intervention was mainly directed towards ADLs, and function-specific treatment was also provided by a professional during home visits                                                                      | (1) Assessment of Motor and Process Skills-motor scale (AMPS-motor scale)<br>(2) modified Rankin Scale (mRS) | At 3 months follow-up           | There were no between-group differences in the change of AMPS score and mRS score at 3 months from baseline |
|             | Usual care (n=51)                              | median (range): 74 (32-98) | 30/21 |                 |                         | Usual care might involve no follow-up rehabilitation, treatment at home by a nurse, physical therapist, or occupational therapist from the home municipality and/or treatment by a private practising physiotherapist |                                                                                                              |                                 |                                                                                                             |
| Walker 1999 | Home-based occupational therapy                | mean (SD): 73.6 (8.1)      | 52/42 | Within 1 month  | Not specified           | Home-based occupational therapy was                                                                                                                                                                                   | Barthel Index (BI)                                                                                           | At 6 months after randomisation | There was significant between-group difference in BI score in favour of                                     |

|            |                                                       |                       |               |               |                                                                                     |                                                                                                            |                              |                                                                                     |                                                                                                                  |
|------------|-------------------------------------------------------|-----------------------|---------------|---------------|-------------------------------------------------------------------------------------|------------------------------------------------------------------------------------------------------------|------------------------------|-------------------------------------------------------------------------------------|------------------------------------------------------------------------------------------------------------------|
|            | (n=94)                                                |                       |               |               |                                                                                     | provided to improve the independence in personal and instrumental ADL by a professional during home visits |                              |                                                                                     | the home-based intervention group at 6 months follow-up                                                          |
|            | Usual care (n=91)                                     | mean (SD): 75.1 (8.6) | 42/49         |               |                                                                                     | Usual care involved existing services of routine rehabilitation                                            |                              |                                                                                     |                                                                                                                  |
| Wolfe 2000 | Home-based rehabilitation (n=23)                      | mean (SD): 72 (12)    | 10/13         | Not specified | Not specified                                                                       | Home-based intervention was provided by professionals during home visits                                   | Modified Barthel Index (MBI) | At 1 year after randomisation                                                       | There was no between-group difference in MBI score at 1 year follow up                                           |
|            | Usual care (n=20)                                     | mean (SD): 76 (7.04)  | 8/12          |               |                                                                                     | Usual care was defined as all other services apart from therapy in home-based intervention group           |                              |                                                                                     |                                                                                                                  |
| Azab 2009  | Home-based constraint-induced movement therapy (CIMT) | Not specified         | Not specified | Not specified | Patients with mild (Brunnstrom recovery scale score of 5 to 6, or BI score of 65 to | (1) Home-based CIMT was supervised and encouraged by a trained                                             | Barthel Index (BI)           | (1) At 4 weeks following CIMT (at treatment endpoints)<br>(2) At 6 months follow up | (1) The home-based intervention group showed greater improvement in BI score than the control group at treatment |



|                |                                                                                      |                        |       |                             |                                                                                                                                                                                |                                                                                                                                                                                                                                                           |                                       |                                        |                                                                                                                                                                                                                                |
|----------------|--------------------------------------------------------------------------------------|------------------------|-------|-----------------------------|--------------------------------------------------------------------------------------------------------------------------------------------------------------------------------|-----------------------------------------------------------------------------------------------------------------------------------------------------------------------------------------------------------------------------------------------------------|---------------------------------------|----------------------------------------|--------------------------------------------------------------------------------------------------------------------------------------------------------------------------------------------------------------------------------|
|                | combined with usual care (n=20)                                                      |                        |       |                             | 90) to moderate (Brunnstrom recovery scale score of 3 to 4, or BI score of 30 to 64) hemiparesis of the affected upper limb                                                    | family member (2) Usual care included physical and occupational therapy                                                                                                                                                                                   |                                       |                                        | endpoint (2) The home-based intervention group showed improvement in BI score at 6 months follow up                                                                                                                            |
|                | Usual care (n=17)                                                                    |                        |       |                             |                                                                                                                                                                                | Usual care included physical and occupational therapy                                                                                                                                                                                                     |                                       |                                        |                                                                                                                                                                                                                                |
| Batchelor 2012 | Home-based multifactorial Falls prevention programme combined with usual care (n=71) | mean (SD): 70.8 (11.4) | 45/26 | mean (SD): 3.0 (1.6) months | Patients with high falls risk who either had fallen during hospital admission or had a Step Test worse leg score of less than 7, or a Berg Balance Scale score of less than 49 | (1) Home-based exercise programme addressing balance and mobility problems and falls risk minimization strategies and injury risk minimization strategies were performed by a professional (2) Usual care including physical and occupational therapy was | Functional Independence Measure (FIM) | At 12 months after baseline assessment | (1) There was no within-group difference of FIM score either in the home-based intervention group or in the control group at 12 months follow up (2) There was no between-group difference in FIM score at 12 months follow up |

|               |                                                                                              |                            |       |                                                                            |                                                                                                        | provided by professionals                                                                                                                                                 |                                                                                              |                                                                      |                                                                                                              |
|---------------|----------------------------------------------------------------------------------------------|----------------------------|-------|----------------------------------------------------------------------------|--------------------------------------------------------------------------------------------------------|---------------------------------------------------------------------------------------------------------------------------------------------------------------------------|----------------------------------------------------------------------------------------------|----------------------------------------------------------------------|--------------------------------------------------------------------------------------------------------------|
|               | Usual care (n=85)                                                                            | mean (SD): 72.2 (9.9)      | 54/31 | mean (SD): 3.1 (1.9) months                                                |                                                                                                        | Usual care including physical and occupational therapy was provided by professionals                                                                                      |                                                                                              |                                                                      |                                                                                                              |
| Chumbler 2012 | Multifaceted stroke telerehabilitation (STeleR) intervention combined with usual care (n=25) | mean (SD): 67.1 (9.5)      | 24/1  | Within 24 months                                                           | mean (SD): 6.7 (1.3) of the Goldstein and Chilukuri algorithm of the Canadian Neurological Scale score | (1) The STeleR intervention included home televisits and telephone intervention calls performed by a teletherapist<br>(2) Routine Veterans Affairs (VA) care was provided | The motor subscale of the Telephone Version of the Functional Independence Measure (FONEFIM) | (1) At 3 months (at treatment endpoint)<br>(2) At 6 months follow up | There was no between-group difference in FONEFIM score either at treatment endpoint or at 6 months follow up |
|               | Usual care (n=23)                                                                            | mean (SD): 67.7 (10.0)     | 23/0  |                                                                            | mean (SD): 6.8 (1.4) of the Goldstein and Chilukuri algorithm of the Canadian Neurological Scale score | Usual VA or non-VA care was provided                                                                                                                                      |                                                                                              |                                                                      |                                                                                                              |
| Corr 1995     | Home-based occupational therapy combined with usual care                                     | mean (range): 75.1 (41-96) | 15/40 | median (range): 11 (2-88) days from stroke onset to stroke unit admission; | Not specified                                                                                          | (1) The home-based intervention including teaching new                                                                                                                    | Barthel Index (BI)                                                                           | At 1 year after stroke                                               | There was no between-group difference in BI score at 1 year follow up                                        |

|                    |                             |                               |       |                                                                                                                                                           |               |                                                                                                                                                                                                                                                                                                                                                                                                                 |                    |                                           |                                                 |
|--------------------|-----------------------------|-------------------------------|-------|-----------------------------------------------------------------------------------------------------------------------------------------------------------|---------------|-----------------------------------------------------------------------------------------------------------------------------------------------------------------------------------------------------------------------------------------------------------------------------------------------------------------------------------------------------------------------------------------------------------------|--------------------|-------------------------------------------|-------------------------------------------------|
|                    | (n=55)                      |                               |       | median (range):<br>50 (5-229) days<br>staying in stroke<br>unit                                                                                           |               | skills; facilitating<br>more<br>independence in<br>activities of daily<br>living;<br>facilitating return<br>of function;<br>enabling patients<br>to use equipment<br>supplied by other<br>agencies, was<br>provided by an<br>occupational<br>therapist during<br>home visits<br>(2) Any other<br>follow up<br>services such as<br>day-hospital<br>attendance and<br>community<br>physiotherapy<br>were provided |                    |                                           |                                                 |
|                    | Usual care<br>(n=55)        | mean (range):<br>75.8 (54-94) | 26/29 | median (range):<br>10 (1-52) days<br>from stroke onset<br>to stroke unit<br>admission;<br>median (range):<br>50 (7-169) days<br>staying in stroke<br>unit |               | Any available<br>services as<br>required were<br>provided                                                                                                                                                                                                                                                                                                                                                       |                    |                                           |                                                 |
| Gilbertson<br>2000 | Domiciliary<br>occupational | median (IQR):<br>71 (28-89)   | 29/38 | median (IQR):<br>31 (17-57) days                                                                                                                          | Not specified | (1) Home-based<br>intervention                                                                                                                                                                                                                                                                                                                                                                                  | Barthel Index (BI) | (1) At 8 weeks (at treatment<br>endpoint) | There was no between-<br>group difference in BI |

|  |                                         |                             |       |                                  |  |                                                                                                                                                                                                                                                                                                                                                                                                                                                  |  |                           |                                                             |
|--|-----------------------------------------|-----------------------------|-------|----------------------------------|--|--------------------------------------------------------------------------------------------------------------------------------------------------------------------------------------------------------------------------------------------------------------------------------------------------------------------------------------------------------------------------------------------------------------------------------------------------|--|---------------------------|-------------------------------------------------------------|
|  | therapy combined with usual care (n=67) |                             |       |                                  |  | which was tailored to recovery ability of self-care or domestic or leisure activities was provided by an occupational therapist during home visits<br>(2) Routine services included inpatient multidisciplinary rehabilitation, a pre-discharge home visit for selected patients, the provision of support services and equipment, regular multidisciplinary review at a stroke clinic, and selected patients referred to a medical day hospital |  | (2) At 6 months follow up | score either at treatment endpoint or at 6 months follow up |
|  | Usual care (n=71)                       | median (IQR):<br>71 (31-89) | 31/40 | median (IQR):<br>23 (13-66) days |  | Routine services included inpatient multidisciplinary rehabilitation, a                                                                                                                                                                                                                                                                                                                                                                          |  |                           |                                                             |

|               |                                                               |                            |       |                   |                                                                                                                                                      |                                                                                                                                                                                                                                                                                    |                                       |                                             |                                                       |
|---------------|---------------------------------------------------------------|----------------------------|-------|-------------------|------------------------------------------------------------------------------------------------------------------------------------------------------|------------------------------------------------------------------------------------------------------------------------------------------------------------------------------------------------------------------------------------------------------------------------------------|---------------------------------------|---------------------------------------------|-------------------------------------------------------|
|               |                                                               |                            |       |                   |                                                                                                                                                      | <p>predischarge home visit for selected patients, the provision of support services and equipment, regular multidisciplinary review at a stroke clinic, and selected patients referred to a medical day hospital</p>                                                               |                                       |                                             |                                                       |
| Goldberg 1997 | Home-based, case-managed care combined with usual care (n=21) | median (range): 72 (65-84) | 10/11 | Within 2-3 months | Patients without severe pre-morbid or comorbid conditions sufficient to impact significantly on their capacity to recover from the qualifying stroke | <p>(1) Home-based intervention including therapeutic recreation, social work, and psychology consultation was provided by a treatment team during home visits</p> <p>(2) Standard outpatient follow-up services included routine medical follow-up visits and, when indicated,</p> | Functional Independence Measure (FIM) | <p>(1) At 6 months</p> <p>(2) At 1 year</p> | No within-group or between-group statistical analysis |

|                |                                                                             |                               |       |                 |               |                                                                                                                                                       |                    |                                                                       |                                                                                                          |
|----------------|-----------------------------------------------------------------------------|-------------------------------|-------|-----------------|---------------|-------------------------------------------------------------------------------------------------------------------------------------------------------|--------------------|-----------------------------------------------------------------------|----------------------------------------------------------------------------------------------------------|
|                |                                                                             |                               |       |                 |               | outpatient rehabilitation service                                                                                                                     |                    |                                                                       |                                                                                                          |
|                | Usual care (n=20)                                                           | median (range):<br>72 (65-81) | 11/9  |                 |               | Standard outpatient follow-up services included routine medical follow-up visits and, when indicated, outpatient rehabilitation service               |                    |                                                                       |                                                                                                          |
| Mandigout 2021 | Individualized home-based coaching programme combine with usual care (n=41) | median (IQR):<br>63 (12)      | 30/11 | Within 6 months | Not specified | (1) The treatment strategy of home-based intervention was not specified<br>(2) Usual care which might include outpatient therapy, medical appointment | Barthel Index (BI) | (1) At 6 months (at treatment endpoint)<br>(2) At 12 months follow up | There was no between-group difference in BI score either at treatment endpoint or at 12 months follow up |
|                | Usual care (n=42)                                                           | median (IQR):<br>58 (24)      | 32/10 |                 |               | Usual care which might include outpatient therapy, medical appointments at 1, 6 and 12                                                                |                    |                                                                       |                                                                                                          |

|              |                                                              |                          |       |                 |                                           |                                                                                                                                                                                                                                                                                                                                                  |                                       |             |                                                                                                                                                                                                            |
|--------------|--------------------------------------------------------------|--------------------------|-------|-----------------|-------------------------------------------|--------------------------------------------------------------------------------------------------------------------------------------------------------------------------------------------------------------------------------------------------------------------------------------------------------------------------------------------------|---------------------------------------|-------------|------------------------------------------------------------------------------------------------------------------------------------------------------------------------------------------------------------|
|              |                                                              |                          |       |                 |                                           | months was provided for 12 months                                                                                                                                                                                                                                                                                                                |                                       |             |                                                                                                                                                                                                            |
| Ricauda 2004 | Home hospitalization service combined with usual care (n=60) | median (IQR): 83 (78-89) | 24/37 | Within 24 hours | median (IQR): 24 (22-26.5) of NIHSS score | (1) The home-based intervention emphasizing a task- and context-oriented approach, which recommended that the patient perform guided, supervised, and self-directed activities in a functional and familiar context was provided by professionals during home visits<br><br>(2) Routine hospital rehabilitation service was provided by physical | Functional Independence Measure (FIM) | At 6 months | (1) Both the home-based intervention group and the control group showed improvement in FIM score at 6 months follow up<br><br>(2) There was no between-group difference in FIM score at 6 months follow up |

|           |                                                                           |                          |       |                                                                  |                                           | therapists                                                                                                                                                                                                                                   |                              |                           |                                                                           |
|-----------|---------------------------------------------------------------------------|--------------------------|-------|------------------------------------------------------------------|-------------------------------------------|----------------------------------------------------------------------------------------------------------------------------------------------------------------------------------------------------------------------------------------------|------------------------------|---------------------------|---------------------------------------------------------------------------|
|           | Usual care (n=60)                                                         | median (IQR): 80 (74-87) | 30/29 |                                                                  | median (IQR): 24 (22-26.5) of NIHSS score | Routine hospital rehabilitation service was provided by physical therapists                                                                                                                                                                  |                              |                           |                                                                           |
| Rudd 1997 | Early discharge with home rehabilitation combined with usual care (n=167) | mean (SD): 70 (11)       | 92/75 | mean (SD): 22 (25) days staying in hospital before randomisation | Not specified                             | (1) Home-based intervention including physiotherapy, occupational therapy and speech therapy was provided by professionals during home visits<br>(2) Conventional care included inpatient treatment, discharge planning, and outpatient care | Modified Barthel Index (MBI) | At 12 months after stroke | There was no between-group difference in MBI score at 12 months follow up |
|           | Usual care (n=164)                                                        | mean (SD): 72 (12)       | 93/71 | mean (SD): 25 (30) days staying in hospital before               |                                           | Conventional care included inpatient treatment, discharge                                                                                                                                                                                    |                              |                           |                                                                           |



|           |                                                                                                       |                        |       |               |                                                                                                                                                                            |                                                                                                                                                                                                                                                                                                                                                  |                              |                                                                                          |                                                                                                                                                                                                                                                                                         |
|-----------|-------------------------------------------------------------------------------------------------------|------------------------|-------|---------------|----------------------------------------------------------------------------------------------------------------------------------------------------------------------------|--------------------------------------------------------------------------------------------------------------------------------------------------------------------------------------------------------------------------------------------------------------------------------------------------------------------------------------------------|------------------------------|------------------------------------------------------------------------------------------|-----------------------------------------------------------------------------------------------------------------------------------------------------------------------------------------------------------------------------------------------------------------------------------------|
|           |                                                                                                       |                        |       | randomisation |                                                                                                                                                                            | planning, and outpatient care                                                                                                                                                                                                                                                                                                                    |                              |                                                                                          |                                                                                                                                                                                                                                                                                         |
| Wong 2015 | 4-week transitional care programme (TCP) with home-based intervention combined with usual care (n=54) | mean (SD): 67.5 (11.6) | 20/34 | Not specified | Patients with slight to moderate neurological deficits (NIHSS score $\geq 4$ or $< 16$ ) and with slight to moderate level of disability (mRS score $\geq 2$ to $\leq 4$ ) | (1) TCP included home-based intervention consisting of management and prevention of stroke recurrence; symptoms assessment and management ; enhancing physical function: self-care abilities and exercise; healthy behaviour: adherence to medication and diet; building resilience: connections with the self, family, social life and a Higher | Modified Barthel Index (MBI) | (1) At 4 weeks after discharge (at treatment endpoint)<br>(2) At 8 weeks after discharge | (1) Both the home-based intervention group and the control group showed improvement in MBI score at treatment endpoint and at 8 weeks follow up<br>(2) The home-based intervention group showed higher MBI scores than the control group at treatment endpoint and at 8 weeks follow up |

|          |                            |                        |               |            |                                                                                                                           |                                                                                                                                                                       |                    |                                                                             |                                                                                                                                                                                                                                      |
|----------|----------------------------|------------------------|---------------|------------|---------------------------------------------------------------------------------------------------------------------------|-----------------------------------------------------------------------------------------------------------------------------------------------------------------------|--------------------|-----------------------------------------------------------------------------|--------------------------------------------------------------------------------------------------------------------------------------------------------------------------------------------------------------------------------------|
|          |                            |                        |               |            |                                                                                                                           | Being; and emotion management<br>(2) Routine hospital-based physical training programme was provided within the first 3 weeks after hospital discharge                |                    |                                                                             |                                                                                                                                                                                                                                      |
|          | Usual care (n=54)          | mean (SD): 71.5 (11.6) | 20/34         |            |                                                                                                                           | Routine hospital-based physical training programme was provided within the first 3 weeks after hospital discharge                                                     |                    |                                                                             |                                                                                                                                                                                                                                      |
| Koç 2015 | Home-based exercise (n=35) | Not specified          | Not specified | 30-90 days | Patients with baseline Barthel index (BI) scores of 60–80 who were ambulatory with supervision and/or an assistive device | Home-based intervention including stretching and flexibility exercises, assistive and resistive exercises, active-assisted range of motion exercises, and progressive | Barthel Index (BI) | (1) At 4 weeks<br>(2) At 8 weeks<br>(3) At 12 weeks (at treatment endpoint) | (1) The home-based intervention group showed improvement in BI score over time<br>(2) The control group showed no improvement in BI score over time<br>(3) The home-based intervention group showed higher BI score than the control |

|           |                                              |                        |       |                  |                                                                                                                                                                                                  |                                                                                                                                                                  |                    |                                     |                                                                                      |
|-----------|----------------------------------------------|------------------------|-------|------------------|--------------------------------------------------------------------------------------------------------------------------------------------------------------------------------------------------|------------------------------------------------------------------------------------------------------------------------------------------------------------------|--------------------|-------------------------------------|--------------------------------------------------------------------------------------|
|           |                                              |                        |       |                  |                                                                                                                                                                                                  | walking programme and relaxation                                                                                                                                 |                    |                                     | group over time                                                                      |
|           | No intervention (n=37)                       |                        |       |                  |                                                                                                                                                                                                  | N/A                                                                                                                                                              |                    |                                     |                                                                                      |
| Lin 2004  | Home-based physical therapy programme (n=9)  | mean (SD): 61.4 (11.2) | 7/2   | More than 1 year | Severe to moderate residual disability with BI score 5–14                                                                                                                                        | Home-based intervention mainly consisted of motor facilitation, postural control training, functional ambulation training with gait correction, and ADL training | Barthel Index (BI) | At 11 weeks (at treatment endpoint) | The intervention group showed greater improvement in BI score than the control group |
|           | No intervention (n=10)                       | mean (SD): 62.8 (9.4)  | 6/4   |                  |                                                                                                                                                                                                  |                                                                                                                                                                  |                    |                                     |                                                                                      |
| Wade 1992 | Home-based physiotherapy intervention (n=49) | mean (SD): 72.3 (9.7)  | 27/22 | More than 1 year | Patients had mobility problems more than one year after stroke: they used a walking or mobility aid, other than just a stick; had had a fall in the previous three months; were unable to manage | The home-based intervention including exercises to improve the walking and balance and ADL practice was provided by a physiotherapist during home visits         | Barthel Index (BI) | At 3 months (at treatment endpoint) | There was no between-group difference in BI score at treatment endpoint              |
|           | No                                           | mean (SD):             | 20/25 |                  |                                                                                                                                                                                                  |                                                                                                                                                                  |                    |                                     |                                                                                      |

|             |                                     |                         |     |          |                                                                                                                                              |                                                                                                                                                                                                                                                                                                                                                 |                                                         |                                     |                                                                                                                                                                                                                                                                                                                                                                                                                                                                |
|-------------|-------------------------------------|-------------------------|-----|----------|----------------------------------------------------------------------------------------------------------------------------------------------|-------------------------------------------------------------------------------------------------------------------------------------------------------------------------------------------------------------------------------------------------------------------------------------------------------------------------------------------------|---------------------------------------------------------|-------------------------------------|----------------------------------------------------------------------------------------------------------------------------------------------------------------------------------------------------------------------------------------------------------------------------------------------------------------------------------------------------------------------------------------------------------------------------------------------------------------|
|             | intervention (n=45)                 | 72.0 (10.6)             |     |          | stairs, slopes, or uneven surfaces independently; or had a slow gait speed >10 s over 10m if under 60, > 12.5 s if 60-69, >16.5 s if over 70 |                                                                                                                                                                                                                                                                                                                                                 |                                                         |                                     |                                                                                                                                                                                                                                                                                                                                                                                                                                                                |
| Walker 1996 | Home-based dressing practice (n=15) | mean (SD): 65.9 (8.16)  | 9/6 | 6 months | Patients with dressing problems                                                                                                              | Home-based intervention involving teaching patients and carers appropriate techniques such as dressing the affected limb first, energy conservation, the use of red thread to overcome perceptual difficulties and to mark alignment of buttons, and advice on choice of clothing, was provided by an occupational therapist during home visits | Rivermead Activities of Daily Living scales (self-care) | At 3 months (at treatment endpoint) | (1) The home-based intervention group showed improvement in Rivermead Activities of Daily Living scales (self-care) score at treatment endpoint<br>(2) The control group showed no improvement in Rivermead Activities of Daily Living scales (self-care) score at treatment endpoint<br>(3) The home-based intervention group showed greater improvement in Rivermead Activities of Daily Living scales (self-care) score than the control group at treatment |
|             | No intervention                     | mean (SD): 70.2 (10.35) | 7/8 |          |                                                                                                                                              | N/A                                                                                                                                                                                                                                                                                                                                             |                                                         |                                     |                                                                                                                                                                                                                                                                                                                                                                                                                                                                |

|           |                                                          |                        |       |                    |                                                                              |                                                                                                                                                                                                                                                                                                                                                                                  |                    |                                     |                                                                                                                                                                                                                                                                                                                                                                        |
|-----------|----------------------------------------------------------|------------------------|-------|--------------------|------------------------------------------------------------------------------|----------------------------------------------------------------------------------------------------------------------------------------------------------------------------------------------------------------------------------------------------------------------------------------------------------------------------------------------------------------------------------|--------------------|-------------------------------------|------------------------------------------------------------------------------------------------------------------------------------------------------------------------------------------------------------------------------------------------------------------------------------------------------------------------------------------------------------------------|
|           | (n=15)                                                   |                        |       |                    |                                                                              |                                                                                                                                                                                                                                                                                                                                                                                  |                    |                                     | endpoint                                                                                                                                                                                                                                                                                                                                                               |
| Wang 2015 | Caregiver-mediated, home-based intervention (CHI) (n=25) | mean (SD): 62.0 (9.5)  | 13/12 | More than 6 months | Patients with mild to moderate disability (Brunnstrom recovery stages III-V) | Home intervention was designed to improve patients' body functions and structural components; to improve patients' ability to undertake everyday activities within their living environments using task-specific restorative and compensatory training methods; and to help the patients reintegrate into the society by participating in restorative outdoor leisure activities | Barthel Index (BI) | At 12 weeks (at treatment endpoint) | <ol style="list-style-type: none"> <li>(1) The home-based intervention group showed improvement in BI score at treatment endpoint</li> <li>(2) The control group showed no improvement in BI score at treatment endpoint</li> <li>(3) The home-based intervention group showed greater improvement in BI score than the control group at treatment endpoint</li> </ol> |
|           | No intervention (n=26)                                   | mean (SD): 65.4 (10.6) | 17/9  |                    |                                                                              | N/A                                                                                                                                                                                                                                                                                                                                                                              |                    |                                     |                                                                                                                                                                                                                                                                                                                                                                        |

N/A: Not applicable
