# Supplementary material
Source: HighWire-hosted journal article supplement (https://bmjopen.bmj.com/content/12/7/e056045)
Supplement: inline-supplementary-material-3 [file inline-supplementary-material-3.pdf]

**Table 2** Summary of intervention details in individual studies

| <b>Author<br/>Year</b> | <b>Brief name</b> | <b>Why</b> | <b>What<br/>(materials)</b> | <b>What<br/>(procedures)</b> | <b>Who provided</b> | <b>How</b> | <b>Where</b> | <b>When and<br/>how much</b> | <b>Tailoring</b> | <b>Modifications<br/>of intervention<br/>throughout<br/>trial</b> | <b>Strategies to<br/>improve or<br/>maintain<br/>intervention<br/>fidelity</b> | <b>Extent of<br/>intervention<br/>on fidelity</b> |
|------------------------|-------------------|------------|-----------------------------|------------------------------|---------------------|------------|--------------|------------------------------|------------------|-------------------------------------------------------------------|--------------------------------------------------------------------------------|---------------------------------------------------|
|------------------------|-------------------|------------|-----------------------------|------------------------------|---------------------|------------|--------------|------------------------------|------------------|-------------------------------------------------------------------|--------------------------------------------------------------------------------|---------------------------------------------------|

|            |                                                                  |                                                                                                                                                                                                      |               |                                                                                                                                                                                                                                                                                                              |                                                                                                                                                                                |                                                             |                                                                                                                                                                                                   |                                                                                                                                                                                                                                                                                                    |                                                                                                                                                                                                                       |               |                                                                                                                                                                                                |                                        |
|------------|------------------------------------------------------------------|------------------------------------------------------------------------------------------------------------------------------------------------------------------------------------------------------|---------------|--------------------------------------------------------------------------------------------------------------------------------------------------------------------------------------------------------------------------------------------------------------------------------------------------------------|--------------------------------------------------------------------------------------------------------------------------------------------------------------------------------|-------------------------------------------------------------|---------------------------------------------------------------------------------------------------------------------------------------------------------------------------------------------------|----------------------------------------------------------------------------------------------------------------------------------------------------------------------------------------------------------------------------------------------------------------------------------------------------|-----------------------------------------------------------------------------------------------------------------------------------------------------------------------------------------------------------------------|---------------|------------------------------------------------------------------------------------------------------------------------------------------------------------------------------------------------|----------------------------------------|
| Asano 2021 | Progressive rehabilitation exercises through tele-rehabilitation | Tele-rehabilitation can enable therapists to work with and evaluate their patients remotely and the patients to perform rehabilitation in the comfort of their own home and at their own convenience | Not specified | (1) Participants and their caregivers were trained to use the hardware and software<br>(2) Participants received progressive rehabilitation exercises including upper limb strengthening, lower limb strengthening, seated balance exercise, standing balance exercise and training of functional activities | (1) A research assistant trained the use of hardware and software:<br>(2) A tele-therapist prescribed the progressive rehabilitation exercises and provided tele-consultations | Online exercises and video calls during a tele-consultation | (1) Training of the use of hardware and software: in acute hospital before discharge or in homes after discharge<br>(2) The progressive rehabilitation exercises took place in participants' home | (1) Training of the use of hardware and software before discharge from acute hospital: 1-3 sessions with each session being an hour long<br>(2) The progressive rehabilitation exercises were provided in participants' home after discharge for three months, with tele-consultations once a week | The difficulty level and minimum range of motion desired for each exercise prescribed is determined by the tele-therapist who will assess and inform the patient of the change before increasing the difficulty level | Not described | Adherence of therapy was recorded by the subject in a diary to record the number of minutes subject spent each day. And the tele-therapist checked the entering data during tele-consultations | 50/61 completed the 3-month assessment |
|------------|------------------------------------------------------------------|------------------------------------------------------------------------------------------------------------------------------------------------------------------------------------------------------|---------------|--------------------------------------------------------------------------------------------------------------------------------------------------------------------------------------------------------------------------------------------------------------------------------------------------------------|--------------------------------------------------------------------------------------------------------------------------------------------------------------------------------|-------------------------------------------------------------|---------------------------------------------------------------------------------------------------------------------------------------------------------------------------------------------------|----------------------------------------------------------------------------------------------------------------------------------------------------------------------------------------------------------------------------------------------------------------------------------------------------|-----------------------------------------------------------------------------------------------------------------------------------------------------------------------------------------------------------------------|---------------|------------------------------------------------------------------------------------------------------------------------------------------------------------------------------------------------|----------------------------------------|

|                 |                                    |                                                                                                                                                                                                                                                                                                                                                                           |               |                                                                                                                                                                         |                                                                                                                                                              |                                                                                                                                                                    |                   |                                                                                                                                                                                                                                              |               |               |                                                                                                         |                                        |
|-----------------|------------------------------------|---------------------------------------------------------------------------------------------------------------------------------------------------------------------------------------------------------------------------------------------------------------------------------------------------------------------------------------------------------------------------|---------------|-------------------------------------------------------------------------------------------------------------------------------------------------------------------------|--------------------------------------------------------------------------------------------------------------------------------------------------------------|--------------------------------------------------------------------------------------------------------------------------------------------------------------------|-------------------|----------------------------------------------------------------------------------------------------------------------------------------------------------------------------------------------------------------------------------------------|---------------|---------------|---------------------------------------------------------------------------------------------------------|----------------------------------------|
| Baskett<br>1999 | Home-based self-directed exercises | Outpatient therapy might disempower the patient and caregiver from believing that they can be actively involved in their own rehabilitation programme. Furthermore, in the hospital setting, it is often difficult to plan ongoing therapy without a detailed understanding of and continuing supervision within the home environment. Therefore, this study investigated | Not specified | (1) Advice on the self-directed therapy programme<br>(2) Self-directed exercises aiming at improve the ability of ADL were prescribed for patients and their caregivers | (1) A physiotherapist and an occupational therapist provided the advice<br>(2) Home-based intervention for patients was mediated by themselves or caregivers | (1) Advice was provided during home visits<br>(2) Home-based interventions for patients were provided by themselves with or without the help of caregivers at home | At patients' home | (1) Advice was provided by professionals once a week for as long as judged necessary, or for a maximum of 13 weeks<br>(2) Patients was encouraged to attempt the prescribed home-based self-directed exercises programme several times a day | Not described | Not described | The subject or caregiver was asked to record the type and duration of activities they achieved each day | 46/50 completed the 3-month assessment |
|-----------------|------------------------------------|---------------------------------------------------------------------------------------------------------------------------------------------------------------------------------------------------------------------------------------------------------------------------------------------------------------------------------------------------------------------------|---------------|-------------------------------------------------------------------------------------------------------------------------------------------------------------------------|--------------------------------------------------------------------------------------------------------------------------------------------------------------|--------------------------------------------------------------------------------------------------------------------------------------------------------------------|-------------------|----------------------------------------------------------------------------------------------------------------------------------------------------------------------------------------------------------------------------------------------|---------------|---------------|---------------------------------------------------------------------------------------------------------|----------------------------------------|

|                |                                           |                                                                                                                                                                                                                                                   |               |                                                                                                                                                                |                                                                                                         |                                                                                         |                   |                                                                                                                   |                                                                                       |               |                                                                                   |                                        |
|----------------|-------------------------------------------|---------------------------------------------------------------------------------------------------------------------------------------------------------------------------------------------------------------------------------------------------|---------------|----------------------------------------------------------------------------------------------------------------------------------------------------------------|---------------------------------------------------------------------------------------------------------|-----------------------------------------------------------------------------------------|-------------------|-------------------------------------------------------------------------------------------------------------------|---------------------------------------------------------------------------------------|---------------|-----------------------------------------------------------------------------------|----------------------------------------|
|                |                                           | the feasibility of the home-based self-directed exercises programme                                                                                                                                                                               |               |                                                                                                                                                                |                                                                                                         |                                                                                         |                   |                                                                                                                   |                                                                                       |               |                                                                                   |                                        |
| Björkdahl 2006 | Home-based intervention                   | Aiming to evaluate if three weeks of rehabilitation in the home setting of younger patients with stroke would improve activity to a larger extent than ordinary outpatient rehabilitation at the clinic and facilitate the rehabilitation process | Not specified | Home-based intervention which was focus on activities in patients' natural context, varying from personal care to shopping and leisure activities was provided | A physiotherapist and an occupational therapist provided the home-based intervention                    | Home-based interventions for patients were provided by professionals during home visits | At patients' home | 9 hours of home-based training per week for three weeks was provided after discharge from the rehabilitation ward | Individually tailored training, based on the patient's needs and desires was provided | Not described | Not described                                                                     | 30/30 completed the 3-week assessment  |
| Chen 2017      | Home-based telesupervising rehabilitation | Aiming to evaluate the efficacy of a telerehabilitation system, which integrated                                                                                                                                                                  | Not specified | (1) Home-based intervention including physical exercises with ADL                                                                                              | Therapists provided instructions and demonstrations of the home-based intervention and tele-supervision | (1) Instructions and demonstrations of the home-based intervention were provided        | At patients' home | (1) Instructions and demonstrations of the home-based intervention                                                | Individualized physical exercise plan was provided                                    | Not described | The caregivers were asked to keep training logs in the record plate of the system | 26/27 completed the 12-week assessment |

|  |  |                                                                                                                                                                                                                                                |  |                                                                                                                                                                                                                    |  |                                                                                                                                                                                  |  |                                                                                                                                                                                                                                                                                                                                                        |  |  |                                                               |
|--|--|------------------------------------------------------------------------------------------------------------------------------------------------------------------------------------------------------------------------------------------------|--|--------------------------------------------------------------------------------------------------------------------------------------------------------------------------------------------------------------------|--|----------------------------------------------------------------------------------------------------------------------------------------------------------------------------------|--|--------------------------------------------------------------------------------------------------------------------------------------------------------------------------------------------------------------------------------------------------------------------------------------------------------------------------------------------------------|--|--|---------------------------------------------------------------|
|  |  | <p>electromyography-triggered neuromuscular stimulation (ETNS) rehabilitation, detection of physiological parameters, medical history records, data storage, and high-quality video-audio system on physical function for stroke survivors</p> |  | <p>training and the ETNS therapy was prescribed and taught by professionals</p> <p>(2) The home-based intervention was performed by participants and the caregivers with the tele-supervision by professionals</p> |  | <p>by professionals face to face during home visits</p> <p>(2) Home-based interventions were performed by patients themselves with or without the help of caregivers at home</p> |  | <p>n were provided until the participants or the caregivers could manage it without the help of the therapists</p> <p>(2) The physical exercises with ADL training were conducted for 1 hour, twice in a working day for 12 weeks, a total of 60 sessions</p> <p>(3) The ETNS was conducted for 20 minutes, twice in a working day for 12 weeks, a</p> |  |  | <p>that faithfully recorded the survivors' daily training</p> |
|--|--|------------------------------------------------------------------------------------------------------------------------------------------------------------------------------------------------------------------------------------------------|--|--------------------------------------------------------------------------------------------------------------------------------------------------------------------------------------------------------------------|--|----------------------------------------------------------------------------------------------------------------------------------------------------------------------------------|--|--------------------------------------------------------------------------------------------------------------------------------------------------------------------------------------------------------------------------------------------------------------------------------------------------------------------------------------------------------|--|--|---------------------------------------------------------------|

|           |                                              |                                                                                                                                                                                                                                                                                                                                                                            |               |                                                                                                                                                                                                                                                                               |                                                                                                         |                                                                                                                                                                                                                                                            |                   |                                                                                                                                                                                                                                                                                                                         |                                                    |               |                                                                                                                                          |                                        |
|-----------|----------------------------------------------|----------------------------------------------------------------------------------------------------------------------------------------------------------------------------------------------------------------------------------------------------------------------------------------------------------------------------------------------------------------------------|---------------|-------------------------------------------------------------------------------------------------------------------------------------------------------------------------------------------------------------------------------------------------------------------------------|---------------------------------------------------------------------------------------------------------|------------------------------------------------------------------------------------------------------------------------------------------------------------------------------------------------------------------------------------------------------------|-------------------|-------------------------------------------------------------------------------------------------------------------------------------------------------------------------------------------------------------------------------------------------------------------------------------------------------------------------|----------------------------------------------------|---------------|------------------------------------------------------------------------------------------------------------------------------------------|----------------------------------------|
|           |                                              |                                                                                                                                                                                                                                                                                                                                                                            |               |                                                                                                                                                                                                                                                                               |                                                                                                         |                                                                                                                                                                                                                                                            |                   | total of 60 sessions                                                                                                                                                                                                                                                                                                    |                                                    |               |                                                                                                                                          |                                        |
| Chen 2020 | Home-based motor training telerehabilitation | Home-based telerehabilitation (TR) has been indicated that TR approaches can be as efficacious as conventional rehabilitation (CR) in improving activities of daily living (ADL), and enhanced the compliance of rehabilitation training. The study aimed to determine the effects of a 12-week home-based motor training TR procedure in subcortical stroke patients with | Not specified | (1) Home-based intervention including physical exercises with ADL training and the ETNS therapy was prescribed and taught by professionals<br><br>(2) The home-based intervention was performed by participants and the caregivers with the tele-supervision by professionals | Therapists provided instructions and demonstrations of the home-based intervention and tele-supervision | (1) Instructions and demonstrations of the home-based intervention were provided by professionals face to face during home visits<br><br>(2) Home-based interventions were performed by patients themselves with or without the help of caregivers at home | At patients' home | (1) Instructions and demonstrations of the home-based intervention were provided until the participants or the caregivers could manage it without the help of the therapists<br><br>(2) The physical exercises with ADL training were conducted for 1 hour, twice in a working day for 12 weeks, a total of 60 sessions | Individualized physical exercise plan was provided | Not described | The caregivers were asked to keep training logs in the record plate of the system that faithfully recorded the survivors' daily training | 26/26 completed the 12-week assessment |

|                            |                                  |                                                                                                                          |               |                                                                          |                                                                                      |                                                          |                   |                                                                                                        |               |               |               |                                                  |
|----------------------------|----------------------------------|--------------------------------------------------------------------------------------------------------------------------|---------------|--------------------------------------------------------------------------|--------------------------------------------------------------------------------------|----------------------------------------------------------|-------------------|--------------------------------------------------------------------------------------------------------|---------------|---------------|---------------|--------------------------------------------------|
|                            |                                  | motor dysfunction                                                                                                        |               |                                                                          |                                                                                      |                                                          |                   | (3) The ETNS was conducted for 20 minutes, twice in a working day for 12 weeks, a total of 60 sessions |               |               |               |                                                  |
| Gladman 1993; Gladman 1994 | Domiciliary-based rehabilitation | Aiming to determine whether stroke patients would make greater improvements in ADL after discharge from hospital         | Not specified | Home-based intervention including physiotherapy and occupational therapy | Two physiotherapists and one occupational therapist provided the domiciliary service | Home-based intervention was performed during home visits | At patients' home | The domiciliary rehabilitation service was provided for up to six months                               | Not described | Not described | Not described | 157/165 completed the domiciliary rehabilitation |
| Han 2020                   | Home-based reablement programme  | There is evidence supporting that the reablement intervention leads to significant improvements in ADL for older adults. | Not specified | Home-based intervention of ADL training                                  | One occupational therapist provided the home-based intervention                      | Home-based intervention was performed during home visits | At patients' home | The home-based intervention was provided 50 minutes each time, once a week for 6 weeks                 | Not described | Not described | Not described | 12/12 completed the 6-weeks assessment           |

|            |                                                                |                                                                                                                                                                                                       |               |                                                                                                                                                          |                                                                                                                                  |                                                                                                                                                              |                   |                                                                                                                                                |                                                      |               |                                                                                                                                         |                                                       |
|------------|----------------------------------------------------------------|-------------------------------------------------------------------------------------------------------------------------------------------------------------------------------------------------------|---------------|----------------------------------------------------------------------------------------------------------------------------------------------------------|----------------------------------------------------------------------------------------------------------------------------------|--------------------------------------------------------------------------------------------------------------------------------------------------------------|-------------------|------------------------------------------------------------------------------------------------------------------------------------------------|------------------------------------------------------|---------------|-----------------------------------------------------------------------------------------------------------------------------------------|-------------------------------------------------------|
|            |                                                                | However, evidence on the effectiveness of reablement for patients with stroke is limited. The study aimed to investigate the effects of reablement in patients with stroke from the 3 concepts of ADL |               |                                                                                                                                                          |                                                                                                                                  |                                                                                                                                                              |                   |                                                                                                                                                |                                                      |               |                                                                                                                                         |                                                       |
| Hesse 2011 | Intermittent high-intensity home-based physiotherapy programme | Aiming to evaluate whether patients undergoing the pulsed high-intensity treatment design would have better motor functions in one year compared to those                                             | Not specified | (1) Intermittent high-intensity home-based intervention of physiotherapy based on the Bobath approach and the motor relearning programme was provided to | (1) Two physiotherapists provided the home-based intervention<br>(2) Self-therapy was performed by patients and their caregivers | (1) Home-based intervention was performed during home visits<br>(2) Self-therapy programme was performed by patients themselves and their caregivers at home | At patients' home | (1) The home-based intervention was provided in three two-month blocks (months 1 + 2, months 5 + 6, months 9 + 10), consisting of four therapy | Individualized self-therapy programme was prescribed | Not described | The patients and their caregivers kept a diary, in addition the therapists phoned the patients every 14 days during self-therapy period | 25/25 completed the 12-months home-based intervention |



|              |                 |                                             |               |                                                                                                                                                                          |                      |                              |                   |                                                                                                                                                                                                                                                                                              |               |               |               |                   |
|--------------|-----------------|---------------------------------------------|---------------|--------------------------------------------------------------------------------------------------------------------------------------------------------------------------|----------------------|------------------------------|-------------------|----------------------------------------------------------------------------------------------------------------------------------------------------------------------------------------------------------------------------------------------------------------------------------------------|---------------|---------------|---------------|-------------------|
|              |                 | receiving continuous low-intensity training |               | improve motor function relevant for patients' everyday life<br>(2) Self-therapy programme consisting of various stretching, strengthening and motor tasks was prescribed |                      |                              |                   | sessions every week, one session lasted 30 to 45 minutes net. The three two-month blocks totalled 96 30 to 45 minute sessions<br>(2) Self-therapy programme was performed between the treatment blocks (months 3 + 4, months 7 + 8, months 11 + 12) for at least 30 minutes in every workday |               |               |               |                   |
| Hofstad 2014 | Early supported | Aimed to compare the                        | Not specified | Not specified                                                                                                                                                            | A multi-disciplinary | (3) Home-based interventions | At patients' home | (1) The scheduled                                                                                                                                                                                                                                                                            | Not described | Not described | Not described | (1) Many patients |

|            |                                                      |                                                                                                                                                                                                   |               |               |                                                                                                                                    |                                                           |                   |                                                                                                                                                                                                                                                                               |                                               |               |               |                                                                                                 |
|------------|------------------------------------------------------|---------------------------------------------------------------------------------------------------------------------------------------------------------------------------------------------------|---------------|---------------|------------------------------------------------------------------------------------------------------------------------------------|-----------------------------------------------------------|-------------------|-------------------------------------------------------------------------------------------------------------------------------------------------------------------------------------------------------------------------------------------------------------------------------|-----------------------------------------------|---------------|---------------|-------------------------------------------------------------------------------------------------|
|            | discharge (ESD) to home with home-based intervention | rehabilitation results after ESD to rehabilitation as usual, and to investigate the effect of community treatment given in two different settings; either in a day unit or in the patients' homes |               |               | community health team, consisting of a nurse, a physiotherapist and an occupational therapist provided the home-based intervention | were provided during home visits                          |                   | treatment period was five weeks and maximally four hours per day, five days a week<br>(2) During the treatment period, team members were present three days a week, and the last two the days of the week the patients trained by themselves after instructions from the team |                                               |               |               | did not comply with the scheduled treatment<br>(2) 85/104 completed the home-based intervention |
| Kalra 2000 | Domiciliary stroke care                              | Aimed to compare the efficacy of stroke unit, stroke team,                                                                                                                                        | Not specified | Not specified | A specialist stroke team provided the home-based intervention                                                                      | Home-based interventions were provided during home visits | At patients' home | The home-based intervention was provided for a maximum                                                                                                                                                                                                                        | Individualised care plan outlining activities | Not described | Not described | 144/153 (including 149 confirmed stroke and 10                                                  |

|              |                           |                                                                                                                                                                                 |                                   |                                                                                                                                                                               |                                                                                                                                                                                 |                                                                                                                                                 |                   |                                                                                                                                                                       |                                               |               |               |                                                         |
|--------------|---------------------------|---------------------------------------------------------------------------------------------------------------------------------------------------------------------------------|-----------------------------------|-------------------------------------------------------------------------------------------------------------------------------------------------------------------------------|---------------------------------------------------------------------------------------------------------------------------------------------------------------------------------|-------------------------------------------------------------------------------------------------------------------------------------------------|-------------------|-----------------------------------------------------------------------------------------------------------------------------------------------------------------------|-----------------------------------------------|---------------|---------------|---------------------------------------------------------|
|              |                           | and domiciliary stroke care in reducing mortality, dependence, and institutionalisation in patients with moderately severe strokes                                              |                                   |                                                                                                                                                                               |                                                                                                                                                                                 |                                                                                                                                                 |                   | of 3 months                                                                                                                                                           | and the objectives of treatment were provided |               |               | confirmed no-stroke) completed the 12-months assessment |
| Özdemir 2001 | Home-based rehabilitation | Aimed to test the hypothesis that medical rehabilitation gains can be obtained through home-based rehabilitation services with professional staff supervision of family members | Not specified                     | (1) Instructions from professional were provided<br>(2) Home-based intervention including conventional exercises and provision of splints, orthoses and devices were provided | (1) A rehabilitation physician and a physiotherapist provided the instructions for family caregivers<br>(2) Family caregivers performed the home-based intervention to patients | (1) Instructions were provided during home visits<br>(2) Home-based interventions were provided by patients and their family caregivers at home | At patients' home | (1) The home-based intervention was provided for at least 2 hours a day, 7 days a week<br>(2) The mean rehabilitation period at home was 64 days (range, 29–150 days) | Not described                                 | Not described | Not described | Not specified                                           |
| Pandian 2015 | Family-led, caregiver-    | The aim of this pilot study was to                                                                                                                                              | A culturally appropriate, simple, | Home-based intervention including                                                                                                                                             | (1) A physiotherapist prescribed                                                                                                                                                | Home-based interventions were provided by                                                                                                       | At patients' home | Caregivers performed the home-based                                                                                                                                   | Not described                                 | Not described | Not described | 44/50 completed the 6-months                            |

|              |                                                   |                                                                                                                                                                                         |                                                                                                                             |                                                                                                                                                                                                                                               |                                                                                                                                                                                                                     |                                                                                                                                                                                                                                                                  |                   |                                                                                                                          |                                                                                                                                                    |               |                                                                                                                                                              |                                         |
|--------------|---------------------------------------------------|-----------------------------------------------------------------------------------------------------------------------------------------------------------------------------------------|-----------------------------------------------------------------------------------------------------------------------------|-----------------------------------------------------------------------------------------------------------------------------------------------------------------------------------------------------------------------------------------------|---------------------------------------------------------------------------------------------------------------------------------------------------------------------------------------------------------------------|------------------------------------------------------------------------------------------------------------------------------------------------------------------------------------------------------------------------------------------------------------------|-------------------|--------------------------------------------------------------------------------------------------------------------------|----------------------------------------------------------------------------------------------------------------------------------------------------|---------------|--------------------------------------------------------------------------------------------------------------------------------------------------------------|-----------------------------------------|
|              | delivered, home-based rehabilitation intervention | determine the feasibility of a multicenter, randomized, controlled trial in India of a family-led, trained caregiver-delivered, home-based rehabilitation intervention vs. routine care | pictorial 'manual' covering key exercises relevant to activities of daily living was provided for patients' caregivers      | positioning, transfers, mobility, task-orientated training (particularly walking, upper-limb, and self-care tasks) was provided                                                                                                               | the home-based intervention<br>(2) Patients' caregivers delivered the home-based intervention to patients                                                                                                           | patients' caregivers at home                                                                                                                                                                                                                                     |                   | intervention when the patients were discharged home                                                                      |                                                                                                                                                    |               |                                                                                                                                                              | assessment                              |
| Redzuan 2012 | Video-based therapy programme at home             | Aiming to evaluate the effectiveness of an intervention using video to deliver therapy at home for patients with stroke                                                                 | A self-instructional audiovisual DVD of standardized rehabilitation procedures and patient handling techniques was provided | Home-based self-instructional intervention including patient positioning and handling; bed mobility; passive range of motion exercises, stretching, and strengthening of the upper limbs and the lower limbs; transfer techniques from bed to | (1) Home-based self-instructional intervention was prescribed and taught to patients and/or their caregivers by therapists<br>(2) Home-based self-instructional intervention was performed by patients and/or their | (1) Home-based self-instructional intervention was prescribed and taught to patients and/or their caregivers by therapists face to face<br>(2) Home-based self-instructional intervention was performed by patients and/or their caregivers with the guidance of | At patients' home | Upon discharge, caregivers and/or patients were encouraged to do the exercises along with the video as often as possible | An investigator and the therapist would go through the video content with each patient and determine the appropriate sections and/or exercises and | Not described | Caregivers and/or patients were encouraged to do the exercises along with the video as often as possible and were asked to record their exercises in a diary | 44/53 completed the 3-months assessment |

|               |                                         |                                                                                                                                                        |               |                                                                                                            |                                                                                         |                                                                           |                   |                                                                                           |                                                                                                                |               |               |                                         |
|---------------|-----------------------------------------|--------------------------------------------------------------------------------------------------------------------------------------------------------|---------------|------------------------------------------------------------------------------------------------------------|-----------------------------------------------------------------------------------------|---------------------------------------------------------------------------|-------------------|-------------------------------------------------------------------------------------------|----------------------------------------------------------------------------------------------------------------|---------------|---------------|-----------------------------------------|
|               |                                         |                                                                                                                                                        |               | wheelchair and vice versa, and wheelchair into the car and vice versa; and activities of daily living      | caregivers                                                                              | a video at home                                                           |                   |                                                                                           | emphasize the important parts of the video according to the patient's stroke severity and resulting impairment |               |               |                                         |
| Roderick 2001 | Domiciliary rehabilitation service      | Aiming to compare the effectiveness and costs of a new domiciliary rehabilitation service for elderly stroke patients with geriatric day-hospital care | Not specified | Not specified                                                                                              | Home-based intervention was provided by a physiotherapist and an occupational therapist | Home-based intervention was performed by professionals during home visits | At patients' home | The home-based intervention was provided until maximum potential for recovery was reached | Not described                                                                                                  | Not described | Not described | 54/66 completed the 6-months assessment |
| Taule 2015    | Early supported discharge (ESD) at home | Current evidence supports ESD from hospital to home after acute hospital                                                                               | Not specified | Home-based intervention was mainly directed towards ADLs, and function-specific treatment was also offered | An occupational therapist and/or a physiotherapist provided the home-based intervention | Home-based intervention was provided during home visits                   | At patients' home | (1) ESD intervention was provided during hospitalization and at home                      | Not described                                                                                                  | Not described | Not described | 39/53 completed the 3 months assessment |

|                              |                                               |                                                                                                                                                                                                                                                                                                                                |               |                                                                  |                                                                                |                                                         |                   |                                                                                                                              |                                 |               |                                                                 |                                             |
|------------------------------|-----------------------------------------------|--------------------------------------------------------------------------------------------------------------------------------------------------------------------------------------------------------------------------------------------------------------------------------------------------------------------------------|---------------|------------------------------------------------------------------|--------------------------------------------------------------------------------|---------------------------------------------------------|-------------------|------------------------------------------------------------------------------------------------------------------------------|---------------------------------|---------------|-----------------------------------------------------------------|---------------------------------------------|
|                              |                                               | treatment as patients have demonstrated benefits in independence. However, the influence of different rehabilitation models on the patients' ADL ability is still scarcely explored. This study aimed to compare three models of rehabilitation : ESD in a day unit, ESD at home and traditional treatment in the municipality |               |                                                                  |                                                                                |                                                         |                   | (2) A home visit was provided after discharge within three days, and lasted for a maximum of five weeks after the home visit |                                 |               |                                                                 |                                             |
| Thorsén 2005; von Koch 2001; | Early supported discharge (ESD) and continued | Aiming to determine whether the home rehabilitation                                                                                                                                                                                                                                                                            | Not specified | Home-based intervention emphasizing a task- and context-oriented | Two physical therapists, two occupational therapists, and one speech therapist | Home-based intervention was provided during home visits | At patients' home | The home-based intervention programme approximately                                                                          | The home-based intervention was | Not described | The duration and type of therapy were recorded in a protocol by | (1) 41/41 completed the 3 months assessment |

|                                     |                        |                                                                                                                                                                                                           |               |                                                                                                                                                      |                                                                                         |                                                         |                   |                                                                                                                                                                                                                                                                                                             |                           |               |                                                                                                           |                                                                                                                                                 |
|-------------------------------------|------------------------|-----------------------------------------------------------------------------------------------------------------------------------------------------------------------------------------------------------|---------------|------------------------------------------------------------------------------------------------------------------------------------------------------|-----------------------------------------------------------------------------------------|---------------------------------------------------------|-------------------|-------------------------------------------------------------------------------------------------------------------------------------------------------------------------------------------------------------------------------------------------------------------------------------------------------------|---------------------------|---------------|-----------------------------------------------------------------------------------------------------------|-------------------------------------------------------------------------------------------------------------------------------------------------|
| von Koch 2000; Widén Holmqvist 1998 | rehabilitation at home | model as developed at the Department of Neurology was more effective and/or resource efficient than current, organizationally diverse rehabilitation in a hospital or day care or through outpatient care |               | approach, which implies that the patient performs guided, supervised, or self-directed activities in a functional and familiar context, was provided | provided the home-based intervention                                                    |                                                         |                   | 3 to 4 months in duration. The frequency of therapy contacts for the patients receiving rehabilitation at home was decided by the providing therapist in consultation with the patient and his or her family. The frequency of home visits was gradually reduced until the therapist discharged the patient | tailored for each patient |               | the therapists. Patients were asked to keep diaries between therapy sessions on time and type of training | nt<br>(2) 40/41 completed the 6 months assessment<br>(3) 39/41 completed the 12 months assessment<br>(4) 30/41 completed the 5 years assessment |
| Young 1992                          | Home physiotherapy     | Aiming to compare the effectiveness of day hospital attendance with home physiotherapy for stroke patients to determine                                                                                   | Not specified | Not specified                                                                                                                                        | One of five experienced community physiotherapists provided the home-based intervention | Home-based intervention was provided during home visits | At patients' home | Not specified                                                                                                                                                                                                                                                                                               | Not described             | Not described | Not described                                                                                             | 56/63 completed the 6 months assessment                                                                                                         |

|             |                                                       |                                                                                                                                                                                                     |               |                                                                                                                                                   |                                                                                                                                                                                         |                                                                                                                                                                                            |                   |                                                                                                                                                                           |                                                   |               |                                                                                                                                                                     |                               |
|-------------|-------------------------------------------------------|-----------------------------------------------------------------------------------------------------------------------------------------------------------------------------------------------------|---------------|---------------------------------------------------------------------------------------------------------------------------------------------------|-----------------------------------------------------------------------------------------------------------------------------------------------------------------------------------------|--------------------------------------------------------------------------------------------------------------------------------------------------------------------------------------------|-------------------|---------------------------------------------------------------------------------------------------------------------------------------------------------------------------|---------------------------------------------------|---------------|---------------------------------------------------------------------------------------------------------------------------------------------------------------------|-------------------------------|
|             |                                                       | which service produces greater functional and social improvement for the patient, reduces emotional stress for the caregiver, and lessens the need for community support                            |               |                                                                                                                                                   |                                                                                                                                                                                         |                                                                                                                                                                                            |                   |                                                                                                                                                                           |                                                   |               |                                                                                                                                                                     |                               |
| Barzel 2015 | Home-based constraint-induced movement therapy (CIMT) | Home CIMT is a modified form of CIMT that reduces the need for professional assistance in ambulatory care, training the increased use of the stroke-affected arm in daily life within the patient's | Not specified | (1) Patients received information and instruction of home CIMT<br>(2) Patients were supervised by a professional who solved problems and adjusted | (1) A physical or occupational therapist provided information and instruction of home CIMT and provided supervision and adjustment through problem solving<br>(2) Home CIMT was coached | (1) 2 home visits to provide information and instruction<br>(2) 3 home visits to supervise and adjust exercises and practice<br>(3) Face-to-face coaching of home CIMT by non-professional | At patients' home | (1) 2 home visits of 50-60 min in the first week<br>(2) 3 home visits of 50-60 min in the next 3 weeks<br>(3) Home CIMT was recommended for 2 h each weekday, giving 40 h | Exercises were adapted to the patient's abilities | Not described | The non-professional coach maintained a training diary to document the time per exercise (using a stopwatch), the number of repetitions, and the time of practising | 82/85 completed the home CIMT |



|                 |                                            |                                                                                                               |                                                                                                                                       |                                                                                                                                                                                                  |                                                                                       |                                              |                   |                                                                                                                                                          |                                                                                                                                                 |               |                                                                                                                                            |                                                                                                                                             |
|-----------------|--------------------------------------------|---------------------------------------------------------------------------------------------------------------|---------------------------------------------------------------------------------------------------------------------------------------|--------------------------------------------------------------------------------------------------------------------------------------------------------------------------------------------------|---------------------------------------------------------------------------------------|----------------------------------------------|-------------------|----------------------------------------------------------------------------------------------------------------------------------------------------------|-------------------------------------------------------------------------------------------------------------------------------------------------|---------------|--------------------------------------------------------------------------------------------------------------------------------------------|---------------------------------------------------------------------------------------------------------------------------------------------|
|                 |                                            | home environment                                                                                              |                                                                                                                                       | exercises and practice which were relevant to everyday life with special focus on activities of daily living (ADL)<br>(3) Patients were instructed to do home CIMT                               | by a non-professional (eg, family member)                                             |                                              |                   | of practice in 20 days                                                                                                                                   |                                                                                                                                                 |               |                                                                                                                                            |                                                                                                                                             |
| Chaiyaw at 2012 | Home-based individual's exercise programme | The programme would be able to improve the ADL and function, decrease disability and increase quality of life | Standard materials on an audiovisual CD of rehabilitation procedures: passive exercise, active exercise, resistance exercise, and ADL | (1) Individual counseling, which focused on education, applying information learned in practical situations, and solving problems was offered to the caregiver if needed<br>(2) The intervention | A physical therapist provided the individual counseling and home-based rehabilitation | Intervention was provided during home visits | At patients' home | (1) Individual counseling was provided before home-based rehabilitation on<br>(2) Home-based rehabilitation was provided once a month for 6 months; Each | Individual counseling, which focused on education, applying information learned in practical situations, and solving problems occurring at home | Not described | (1) The duration and type of therapy were recorded on a case report form by the therapist<br>(2) Patients or caregivers were asked to keep | (1) 30/30 completed the home-based rehabilitation programme<br>(2) Compliance with the intervention, as indicated by daily records was high |

|                 |                                            |                                                                                                                                                                                                                                            |                                                                                                                                       |                                                                                                                                                                                                                                               |                                                                                       |                                              |                   |                                                                                                                                                                                                          |                                                                                                                                                 |               |                                                                                                                                                                                                              |                                                                                                                                                                                         |
|-----------------|--------------------------------------------|--------------------------------------------------------------------------------------------------------------------------------------------------------------------------------------------------------------------------------------------|---------------------------------------------------------------------------------------------------------------------------------------|-----------------------------------------------------------------------------------------------------------------------------------------------------------------------------------------------------------------------------------------------|---------------------------------------------------------------------------------------|----------------------------------------------|-------------------|----------------------------------------------------------------------------------------------------------------------------------------------------------------------------------------------------------|-------------------------------------------------------------------------------------------------------------------------------------------------|---------------|--------------------------------------------------------------------------------------------------------------------------------------------------------------------------------------------------------------|-----------------------------------------------------------------------------------------------------------------------------------------------------------------------------------------|
|                 |                                            |                                                                                                                                                                                                                                            |                                                                                                                                       | strategy included exercises and ADL practice                                                                                                                                                                                                  |                                                                                       |                                              |                   | home-based rehabilitation lasted approximately 1 h                                                                                                                                                       |                                                                                                                                                 |               | diaries between therapy sessions on the time and type of training                                                                                                                                            |                                                                                                                                                                                         |
| Chaiyaw at 2009 | Individual's home-based exercise programme | Because inpatient rehabilitation programmes in Thailand are not widely available, the demand for home rehabilitation is increasing. Therefore, a model for effective home rehabilitation for stroke patients will help improve stroke care | Standard materials on an audiovisual CD of rehabilitation procedures: passive exercise, active exercise, resistance exercise, and ADL | (1) Individual counseling, which focused on education, applying information learned in practical situations, and solving problems was offered to the caregiver if needed<br>(2) The intervention strategy included exercises and ADL practice | A physical therapist provided the individual counseling and home-based rehabilitation | Intervention was provided during home visits | At patients' home | (1) Individual counseling was provided before home-based rehabilitation<br>(2) Home-based rehabilitation was provided once a month for 3 months; Each home-based rehabilitation lasted approximately 1 h | Individual counseling, which focused on education, applying information learned in practical situations, and solving problems occurring at home | Not described | (1) The duration and type of therapy were recorded on a case report form by the therapist<br>(2) Patients or caregivers were asked to keep diaries between therapy sessions on the time and type of training | (1) 30/30 completed the home-based rehabilitation programme<br>(2) Compliance with the intervention (as indicated by daily records) at one, two, and three months was 94%, 95%, and 95% |

|           |                                                           |                                                                                                                                                                                                                                                                                                                                               |               |                                                                                                                                                                                                                                                                                                                                            |                                                                                                                                                                                              |                                                                                    |                       |                                                                                                                                                                                                                                                                                                                                   |                                                                                                                     |               |               |                                                                  |
|-----------|-----------------------------------------------------------|-----------------------------------------------------------------------------------------------------------------------------------------------------------------------------------------------------------------------------------------------------------------------------------------------------------------------------------------------|---------------|--------------------------------------------------------------------------------------------------------------------------------------------------------------------------------------------------------------------------------------------------------------------------------------------------------------------------------------------|----------------------------------------------------------------------------------------------------------------------------------------------------------------------------------------------|------------------------------------------------------------------------------------|-----------------------|-----------------------------------------------------------------------------------------------------------------------------------------------------------------------------------------------------------------------------------------------------------------------------------------------------------------------------------|---------------------------------------------------------------------------------------------------------------------|---------------|---------------|------------------------------------------------------------------|
| Chen 2021 | Nurse-guided home-based rehabilitation exercise programme | Exercise training is strongly recommended for patients post-stroke, and the time spent in hospital may not be sufficient to prepare patients for further rehabilitation. Also, home-based rehabilitation was proved to decrease the level of disability and correspondingly improve functional recovery among patients with motor impairments | Not specified | (1) Environmental modification was provided to diminish any environmental hazards<br>(2) Exercise programme was provided which mainly included strengthening the lower limb muscle groups with exercises, such as joint training, sit-ups, balance training while standing, standing, bending to pick things up, straight leg-lifting, and | An advanced practice registered nurse (APRN) who had received professional physiotherapy training provided environmental modification and guidance of patients during the exercise programme | Environmental modification and exercise programme were provided during home visits | At participants' home | (1) During the first home visit, the nurse modified the environmental hazards<br>(2) During the first 3 months, patients underwent three exercise sessions per week, with each session lasting 30 min<br>(3) During the next 3 months, patients underwent one session per week<br>(4) Thereafter, the frequency of the supervised | The home-based rehabilitation exercise programme was an individually tailored rehabilitation intervention programme | Not described | Not described | 59/70 completed the home-based rehabilitation exercise programme |
|-----------|-----------------------------------------------------------|-----------------------------------------------------------------------------------------------------------------------------------------------------------------------------------------------------------------------------------------------------------------------------------------------------------------------------------------------|---------------|--------------------------------------------------------------------------------------------------------------------------------------------------------------------------------------------------------------------------------------------------------------------------------------------------------------------------------------------|----------------------------------------------------------------------------------------------------------------------------------------------------------------------------------------------|------------------------------------------------------------------------------------|-----------------------|-----------------------------------------------------------------------------------------------------------------------------------------------------------------------------------------------------------------------------------------------------------------------------------------------------------------------------------|---------------------------------------------------------------------------------------------------------------------|---------------|---------------|------------------------------------------------------------------|

|           |                                        |                                                                                                                                                                                                     |               |                                                                                                                                                                                                                                                                |                                                                                                                                                                                                                                                                                                                                                              |                                                           |                   |                                                                                                                                                                                                                                 |               |               |               |                                                            |
|-----------|----------------------------------------|-----------------------------------------------------------------------------------------------------------------------------------------------------------------------------------------------------|---------------|----------------------------------------------------------------------------------------------------------------------------------------------------------------------------------------------------------------------------------------------------------------|--------------------------------------------------------------------------------------------------------------------------------------------------------------------------------------------------------------------------------------------------------------------------------------------------------------------------------------------------------------|-----------------------------------------------------------|-------------------|---------------------------------------------------------------------------------------------------------------------------------------------------------------------------------------------------------------------------------|---------------|---------------|---------------|------------------------------------------------------------|
|           |                                        |                                                                                                                                                                                                     |               | climbing stairs                                                                                                                                                                                                                                                |                                                                                                                                                                                                                                                                                                                                                              |                                                           |                   | exercise dropped to once a month, and once every other month, up to 12 months                                                                                                                                                   |               |               |               |                                                            |
| Deng 2020 | Integrated transitional care programme | Transitional care (TC) interventions have emerged as a potential solution to ensure the continuity and coordination of healthcare when patients transfer across care settings and between providers | Not specified | As soon as the patient was discharged to home, the home-based intervention was performed, including (1) ongoing stroke rehabilitation, (2) medication reconciliation and (3) self-management education regarding risk factors control and stroke warning signs | A multidisciplinary poststroke consultation team consisting of a community-based general practitioner, a nurse and a rehabilitation therapist. The extended team members included a neurologist, a rehabilitation specialist and social workers. To ensure the continuity of care delivery, a nurse in the community setting was designated as a coordinator | Home-based interventions were provided during home visits | At patients' home | (1) The scheduled treatment was 8 weeks and maximally 2 hours per day<br>(2) During the first 4 weeks, team members were present three days a week<br>(3) Periodic phone calls were used to understand patient changes.<br>At a | Not described | Not described | Not described | 49/49 completed the Integrated transitional care programme |

|             |                                                    |                                                                                                                                                                   |               |                                                                                                                                                         |                                                                 |                                                           |                   |                                                                                                                                                                       |                                                                                 |               |               |                                                   |
|-------------|----------------------------------------------------|-------------------------------------------------------------------------------------------------------------------------------------------------------------------|---------------|---------------------------------------------------------------------------------------------------------------------------------------------------------|-----------------------------------------------------------------|-----------------------------------------------------------|-------------------|-----------------------------------------------------------------------------------------------------------------------------------------------------------------------|---------------------------------------------------------------------------------|---------------|---------------|---------------------------------------------------|
|             |                                                    |                                                                                                                                                                   |               |                                                                                                                                                         |                                                                 |                                                           |                   | <p>minimum, patients were contacted twice a week for the first four weeks postdischarge</p> <p>(4) During the next 4 weeks, team members were present once a week</p> |                                                                                 |               |               |                                                   |
| Duncan 1998 | Therapist-supervised home-based exercise programme | Emerging evidence suggested that intensive remedial therapy like aerobic training may be beneficial for stroke survivors, as a result, researchers combined all 3 | Not specified | <p>(1) 10-minute warm-up session of stretching and flexibility exercise</p> <p>(2) The first block included assistive and resistive exercises using</p> | A physical therapist provided the home-based exercise programme | Home-based interventions were provided during home visits | At patients' home | <p>(1) The experimental exercise intervention was initiated within 5 days of baseline testing</p> <p>(2) The programme included 3 visits a week for 8</p>             | (1) Resistance progression was based on a protocol in which when subjects could | Not described | Not described | 10/10 completed the home-based exercise programme |

|  |  |                                                                   |  |                                                                                                                                                                                                                                                                                                                                                                               |  |  |  |                                                                                                                                                                                   |                                                                                                                                                                                    |  |  |  |
|--|--|-------------------------------------------------------------------|--|-------------------------------------------------------------------------------------------------------------------------------------------------------------------------------------------------------------------------------------------------------------------------------------------------------------------------------------------------------------------------------|--|--|--|-----------------------------------------------------------------------------------------------------------------------------------------------------------------------------------|------------------------------------------------------------------------------------------------------------------------------------------------------------------------------------|--|--|--|
|  |  | components (strength, balance, and endurance) into 1 intervention |  | <p>Proprioceptive Neuromuscular Facilitation Patterns (PNF) or Theraband exercise to the major muscle groups of the upper and lower extremities</p> <p>(3) The second block included 15 minutes of balance exercises,</p> <p>(4) In the third block, participants were encouraged to use the affected upper extremity in functional activities</p> <p>(5) The final block</p> |  |  |  | <p>weeks, and the patients were instructed to continue the exercise programme on their own for 4 additional weeks</p> <p>(3) Each exercise session lasted approximately 1.5 h</p> | <p>complete 2 sets of 10 repetitions through the available range of motion, resistance was increased by progression of Theraband elasticity (levels of resistance) or by incre</p> |  |  |  |
|--|--|-------------------------------------------------------------------|--|-------------------------------------------------------------------------------------------------------------------------------------------------------------------------------------------------------------------------------------------------------------------------------------------------------------------------------------------------------------------------------|--|--|--|-----------------------------------------------------------------------------------------------------------------------------------------------------------------------------------|------------------------------------------------------------------------------------------------------------------------------------------------------------------------------------|--|--|--|

|              |                                    |                                                   |               |                                                                                         |                                                           |                                                           |                   |                                        |                                                                                                                                                 |               |               |                                  |
|--------------|------------------------------------|---------------------------------------------------|---------------|-----------------------------------------------------------------------------------------|-----------------------------------------------------------|-----------------------------------------------------------|-------------------|----------------------------------------|-------------------------------------------------------------------------------------------------------------------------------------------------|---------------|---------------|----------------------------------|
|              |                                    |                                                   |               | included a progressive walking programme or progressive exercise on a bicycle ergometer |                                                           |                                                           |                   |                                        | ased manual resistance in PNF exercises<br>(2) Individuals were instructed to walk at their usual pace or bicycle at low revolutions per minute |               |               |                                  |
| Hofstad 2014 | Early supported discharge (ESD) to | Aimed to compare the rehabilitation results after | Not specified | Not specified                                                                           | A multi-disciplinary community health team, consisting of | Home-based interventions were provided during home visits | At patients' home | (1) The scheduled treatment period was | Not described                                                                                                                                   | Not described | Not described | (3) Many patients did not comply |

|              |                                                              |                                                                                                                                                                      |               |                                                                                           |                                                                                               |                                                           |                   |                                                                                                                                                                                                                                                          |               |               |               |                                                                                  |
|--------------|--------------------------------------------------------------|----------------------------------------------------------------------------------------------------------------------------------------------------------------------|---------------|-------------------------------------------------------------------------------------------|-----------------------------------------------------------------------------------------------|-----------------------------------------------------------|-------------------|----------------------------------------------------------------------------------------------------------------------------------------------------------------------------------------------------------------------------------------------------------|---------------|---------------|---------------|----------------------------------------------------------------------------------|
|              | home with home-based intervention                            | ESD to rehabilitation as usual, and to investigate the effect of community treatment given in two different settings; either in a day unit or in the patients' homes |               |                                                                                           | a nurse, a physiotherapist and an occupational therapist provided the home-based intervention |                                                           |                   | five weeks and maximally four hours per day, five days a week<br>(2) During the treatment period, team members were present three days a week, and the last two the days of the week the patients trained by themselves after instructions from the team |               |               |               | with the scheduled treatment<br>(4) 85/104 completed the home-based intervention |
| Lincoln 2004 | Home-based intervention performed by a community stroke team | Aimed to assess whether rehabilitation by a specialist multiprofessi                                                                                                 | Not specified | Rehabilitation service including physiotherapy, occupational therapy, speech and language | A multidisciplinary team provided the home-based intervention                                 | Home-based interventions were provided during home visits | At patients' home | Home-based rehabilitation was provided for as long as it was considered patients were benefiting                                                                                                                                                         | Not described | Not described | Not described | Not described                                                                    |



|              |                                                 |                                                                                                                                                                                      |                                                                   |                                                                                                                                                                  |                                                                                                                                                      |                                                                                                                                                     |                                                                                                                                        |                                                                                                                                                                                      |               |               |                                                                                                                                     |                                                                                                                                 |
|--------------|-------------------------------------------------|--------------------------------------------------------------------------------------------------------------------------------------------------------------------------------------|-------------------------------------------------------------------|------------------------------------------------------------------------------------------------------------------------------------------------------------------|------------------------------------------------------------------------------------------------------------------------------------------------------|-----------------------------------------------------------------------------------------------------------------------------------------------------|----------------------------------------------------------------------------------------------------------------------------------------|--------------------------------------------------------------------------------------------------------------------------------------------------------------------------------------|---------------|---------------|-------------------------------------------------------------------------------------------------------------------------------------|---------------------------------------------------------------------------------------------------------------------------------|
|              |                                                 | onal team improved the outcome, in terms of functional abilities, mood, quality of life and satisfaction with care, as compared with conventional outpatient rehabilitation services |                                                                   | therapy                                                                                                                                                          |                                                                                                                                                      |                                                                                                                                                     |                                                                                                                                        |                                                                                                                                                                                      |               |               |                                                                                                                                     |                                                                                                                                 |
| Lindley 2017 | Family-led rehabilitation after stroke in India | Given that low-income and middle-income countries have only about 3% equivalent purchasing power to spend on health care compared with high-income countries, any new                | An intervention manual was provided for the patient and caregiver | (1) Family rehabilitation training involved training family members to provide a simplified version of evidence-based rehabilitation, and included comprehensive | (1) A rehabilitation professional provided the family rehabilitation training<br>(2) Home-based intervention for patients was mediated by caregivers | (1) Family rehabilitation training was provided during home visits<br>(2) Home-based interventions for patients were provided by caregivers at home | (1) The family rehabilitation training was started in hospital, and continued at home<br>(2) The home-based intervention was performed | (1) The family rehabilitation training was designed to take place for about 1 h a day in hospital for about 3 days. After hospital discharge, up to six home visits were provided to | Not described | Not described | (1) For family rehabilitation training, a log of trial interventions was kept by the professional for each participant for hospital | (1) The family rehabilitation training program was delivered as planned with a mean time of 3·0 h in hospital. And an additiona |

|  |  |                                                                                                                                                                                                                       |  |                                                                                                                                                                                                                                                                                                                            |  |  |         |                                                                                                                                                                                                |  |  |                                                                                                                                                                                                                   |                                                                                                                                                                                      |
|--|--|-----------------------------------------------------------------------------------------------------------------------------------------------------------------------------------------------------------------------|--|----------------------------------------------------------------------------------------------------------------------------------------------------------------------------------------------------------------------------------------------------------------------------------------------------------------------------|--|--|---------|------------------------------------------------------------------------------------------------------------------------------------------------------------------------------------------------|--|--|-------------------------------------------------------------------------------------------------------------------------------------------------------------------------------------------------------------------|--------------------------------------------------------------------------------------------------------------------------------------------------------------------------------------|
|  |  | model of stroke rehabilitation should be both sustainable and effective. Researchers hypothesised that family caregiver delivered rehabilitation would increase independence and survival after stroke unit admission |  | impairment and disability assessment by the coordinators; information provision; joint goal setting with the patient and caregiver for basic activities of daily living (ADL), extended ADL (EADL), and communication; caregiver training for limb positioning; encouragement of the practice of task-specific activities; |  |  | at home | assess progress, continue caregiver training activities, and reset goals<br>(2) Patients and their caregivers were encouraged to performed the home-based intervention after discharge to home |  |  | and home visit activities<br>(2) Patients and their caregivers were encouraged to perform family-led rehabilitation and they were encouraged to keep log of rehabilitation activities for 30 days after discharge | 13.1 h of training were delivered during home visits<br>(2) Patients and caregivers reported 17.8 h of family-led rehabilitation given in the first 30 days after hospital discharge |
|--|--|-----------------------------------------------------------------------------------------------------------------------------------------------------------------------------------------------------------------------|--|----------------------------------------------------------------------------------------------------------------------------------------------------------------------------------------------------------------------------------------------------------------------------------------------------------------------------|--|--|---------|------------------------------------------------------------------------------------------------------------------------------------------------------------------------------------------------|--|--|-------------------------------------------------------------------------------------------------------------------------------------------------------------------------------------------------------------------|--------------------------------------------------------------------------------------------------------------------------------------------------------------------------------------|

|           |                                                                                                       |                                                                                                                                                                           |                           |                                                                                                                                                                              |                                                               |                                                                                                      |                   |                                                                                                        |                                                      |               |               |                     |
|-----------|-------------------------------------------------------------------------------------------------------|---------------------------------------------------------------------------------------------------------------------------------------------------------------------------|---------------------------|------------------------------------------------------------------------------------------------------------------------------------------------------------------------------|---------------------------------------------------------------|------------------------------------------------------------------------------------------------------|-------------------|--------------------------------------------------------------------------------------------------------|------------------------------------------------------|---------------|---------------|---------------------|
|           |                                                                                                       |                                                                                                                                                                           |                           | and reminders to prepare the patient and carer for hospital discharge<br>(2) Home-based intervention mediated by caregivers was prescribed for patients and their caregivers |                                                               |                                                                                                      |                   |                                                                                                        |                                                      |               |               |                     |
| Mayo 2000 | Tailor-made home programme of rehabilitation and nursing services with prompt discharge from hospital | Aimed to evaluate the effectiveness of prompt discharge combined with home rehabilitation on health-related quality of life (HRQL), community reintegration, and function | Not specified             | Home-based intervention included physical therapy, occupational therapy, speech therapy, and dietary consultation                                                            | A multidisciplinary team provided the home-based intervention | Home-based interventions were provided during home visits and supplemented with telephone monitoring | At patients' home | (1) The duration of the intervention was 4 weeks<br>(2) Subsequent home visits were arranged as needed | Intervention was individualized to a patient's needs | Not described | Not described | Not described       |
| Rasmussen | Early home-based                                                                                      | Aimed to evaluate the                                                                                                                                                     | After being discharged to | (1) Home-based                                                                                                                                                               | A multidisciplinary,                                          | Home-based interventions were                                                                        | At patients' home | (1) As soon as an                                                                                      | Home-based                                           | Not described | Not described | 36/38 completed the |

|      |                |                                                                                                          |                                                                   |                                                                                                                                                                                                                                                                                                                                                          |                                                                                                                                                         |                             |  |                                                                                                                                                                                                                                                                                        |                                                                      |  |  |                         |
|------|----------------|----------------------------------------------------------------------------------------------------------|-------------------------------------------------------------------|----------------------------------------------------------------------------------------------------------------------------------------------------------------------------------------------------------------------------------------------------------------------------------------------------------------------------------------------------------|---------------------------------------------------------------------------------------------------------------------------------------------------------|-----------------------------|--|----------------------------------------------------------------------------------------------------------------------------------------------------------------------------------------------------------------------------------------------------------------------------------------|----------------------------------------------------------------------|--|--|-------------------------|
| 2016 | rehabilitation | efficacy of early home-based rehabilitation compared with standard care three months after stroke onset. | homes, written plans for training sessions were given to patients | interventions before discharge included physical exercises and training of activities of daily living<br>(2) After being discharged to homes, patients received written plans for training sessions, and received help to perform activities of daily living and continued rehabilitation training, which focused on the patient's occupational problems | intersectoral and interventional team including a nurse, physiotherapists, occupational therapists and physicians, provided the home-based intervention | provided during home visits |  | inpatient was able to train at home, home-based interventions were performed one to three times per week<br>(2) After discharged to home, the home-based interventions were provided one to five days per week for up to four weeks according to the ability and needs of the patients | training was based upon the patient's needs and rehabilitation goals |  |  | home-based intervention |
|------|----------------|----------------------------------------------------------------------------------------------------------|-------------------------------------------------------------------|----------------------------------------------------------------------------------------------------------------------------------------------------------------------------------------------------------------------------------------------------------------------------------------------------------------------------------------------------------|---------------------------------------------------------------------------------------------------------------------------------------------------------|-----------------------------|--|----------------------------------------------------------------------------------------------------------------------------------------------------------------------------------------------------------------------------------------------------------------------------------------|----------------------------------------------------------------------|--|--|-------------------------|

|              |                                               |                                                                                                                                                                                                                                                                       |               |                                                                                                                                                                                                                                                                                                                                                       |                                                                      |                                                           |                                                                      |                                                                                                                                                                         |                                                                                                                                                                     |               |               |               |
|--------------|-----------------------------------------------|-----------------------------------------------------------------------------------------------------------------------------------------------------------------------------------------------------------------------------------------------------------------------|---------------|-------------------------------------------------------------------------------------------------------------------------------------------------------------------------------------------------------------------------------------------------------------------------------------------------------------------------------------------------------|----------------------------------------------------------------------|-----------------------------------------------------------|----------------------------------------------------------------------|-------------------------------------------------------------------------------------------------------------------------------------------------------------------------|---------------------------------------------------------------------------------------------------------------------------------------------------------------------|---------------|---------------|---------------|
| Santana 2017 | Early home-supported discharge (EHSD) service | While EHSD services for stroke patients have been researched in Scandinavia and the United Kingdom, no trials have taken place in the health systems environment of Southern Europe. The present study was developed as part of a European project on integrated care | Not specified | (1) Patients and carers received education on healthy behaviours and information about stroke<br>(2) The mix of physiotherapy, occupational therapy and psychology sessions was also adapted to the specific condition of each patient. Rehabilitation was focused on daily activities valued by the patient in their usual context<br>(3) Caregivers | Two physiotherapists, two occupational therapists and a psychologist | Home-based interventions were provided during home visits | The EHSD intervention was started in hospital, and continued at home | (1) EHSD intervention started during patients' stay at the stroke unit<br>(2) Approximately eight home-based training sessions for a maximum of one month were provided | (1) Information and training was tailored to the patient's needs<br>(2) Rehabilitation was focused on daily activities valued by the patient in their usual context | Not described | Not described | Not described |
|--------------|-----------------------------------------------|-----------------------------------------------------------------------------------------------------------------------------------------------------------------------------------------------------------------------------------------------------------------------|---------------|-------------------------------------------------------------------------------------------------------------------------------------------------------------------------------------------------------------------------------------------------------------------------------------------------------------------------------------------------------|----------------------------------------------------------------------|-----------------------------------------------------------|----------------------------------------------------------------------|-------------------------------------------------------------------------------------------------------------------------------------------------------------------------|---------------------------------------------------------------------------------------------------------------------------------------------------------------------|---------------|---------------|---------------|

|            |                                         |                                                                                                                                                                                                                                            |               |                                                                                                                         |                                                                                         |                                                         |                   |                                                                                                                                                                                                |               |               |               |                                         |
|------------|-----------------------------------------|--------------------------------------------------------------------------------------------------------------------------------------------------------------------------------------------------------------------------------------------|---------------|-------------------------------------------------------------------------------------------------------------------------|-----------------------------------------------------------------------------------------|---------------------------------------------------------|-------------------|------------------------------------------------------------------------------------------------------------------------------------------------------------------------------------------------|---------------|---------------|---------------|-----------------------------------------|
|            |                                         |                                                                                                                                                                                                                                            |               | were trained and made aware of the competencies and ability of the patient and were encouraged to follow their progress |                                                                                         |                                                         |                   |                                                                                                                                                                                                |               |               |               |                                         |
| Taule 2015 | Early supported discharge (ESD) at home | Current evidence supports ESD from hospital to home after acute hospital treatment as patients have demonstrated benefits in independence. However, the influence of different rehabilitation models on the patients' ADL ability is still | Not specified | Home-based intervention was mainly directed towards ADLs, and function-specific treatment was also offered              | An occupational therapist and/or a physiotherapist provided the home-based intervention | Home-based intervention was provided during home visits | At patients' home | (1) ESD intervention was provided during hospitalization and at home<br>(2) A home visit was provided after discharge within three days, and lasted for a maximum of five weeks after the home | Not described | Not described | Not described | 39/53 completed the 3 months assessment |

|             |                                 |                                                                                                                                                              |               |                                                                                                |                                                                                     |                                                         |                   |                                                                                                          |                                                                                                      |               |               |               |
|-------------|---------------------------------|--------------------------------------------------------------------------------------------------------------------------------------------------------------|---------------|------------------------------------------------------------------------------------------------|-------------------------------------------------------------------------------------|---------------------------------------------------------|-------------------|----------------------------------------------------------------------------------------------------------|------------------------------------------------------------------------------------------------------|---------------|---------------|---------------|
|             |                                 | scarcely explored. This study aimed to compare three models of rehabilitation : ESD in a day unit, ESD at home and traditional treatment in the municipality |               |                                                                                                |                                                                                     |                                                         |                   | visit                                                                                                    |                                                                                                      |               |               |               |
| Walker 1999 | Home-based occupational therapy | Aimed to evaluate the effect of occupational therapy on stroke patients who were not admitted to hospital                                                    | Not specified | Occupational therapy was provided to improve the independence in personal and instrumental ADL | A research occupational therapist provided the home-based intervention              | Home-based intervention was provided during home visits | At patients' home | The home-based intervention was provided for patients with stroke 1 month after onset for up to 5 months | The frequency of intervention was agreed between the therapist, patients and if relevant, the carers | Not described | Not described | Not described |
| Wolfe 2000  | Home-based rehabilitation       | Stroke patients requiring rehabilitation , those not                                                                                                         | Not specified | Not specified                                                                                  | A rehabilitation team including a physiotherapist, occupational therapist, a speech | Home-based intervention was provided during home visits | At patients' home | The home-based intervention was provided for a maximum                                                   | Not described                                                                                        | Not described | Not described | Not described |

|           |                                                                                |                                                                                                                                                                                                                                                                        |               |                                                                                                             |                                                                                               |                                                                                               |                                                             |                                                                                                                             |                                                                                                     |               |                                                                                         |               |
|-----------|--------------------------------------------------------------------------------|------------------------------------------------------------------------------------------------------------------------------------------------------------------------------------------------------------------------------------------------------------------------|---------------|-------------------------------------------------------------------------------------------------------------|-----------------------------------------------------------------------------------------------|-----------------------------------------------------------------------------------------------|-------------------------------------------------------------|-----------------------------------------------------------------------------------------------------------------------------|-----------------------------------------------------------------------------------------------------|---------------|-----------------------------------------------------------------------------------------|---------------|
|           |                                                                                | admitted to hospital were significantly less likely to receive rehabilitation than those admitted. In an attempt to redress this situation, researchers aimed to assess the effectiveness of providing rehabilitation to non-admitted stroke patients in a pilot trial |               |                                                                                                             | and language therapist and a therapy aid, provided the home-based intervention                |                                                                                               |                                                             | of 3 months                                                                                                                 |                                                                                                     |               |                                                                                         |               |
| Azab 2009 | Home-based constraint-induced movement therapy (CIMT) combined with usual care | Aiming to investigate the effect of home-based CIMT on the Barthel Index (BI)                                                                                                                                                                                          | Not specified | (1) Home-based CIMT consisted of the participant wearing a "mitt" on the uninvolved hand while practicing a | A family member supervised and encouraged the patients to perform the home-based intervention | A family member supervised and encouraged the patients to perform the home-based intervention | The home-based intervention was performed at patients' home | (1) The home-based intervention was performed for 6 to 7 hours per day for a period of 4 consecutive weeks<br>(2) The usual | Participants were encouraged to progress the task goal according to their motor capabilities or the | Not described | Compliance was reported by the trained family member in the home diary activities sheet | Not described |



|                |                                            |                                              |               |                                                                                                                                                                                                                                                                                                                |                                                        |                                                             |                                 |                                                                     |                              |               |                                         |                                   |
|----------------|--------------------------------------------|----------------------------------------------|---------------|----------------------------------------------------------------------------------------------------------------------------------------------------------------------------------------------------------------------------------------------------------------------------------------------------------------|--------------------------------------------------------|-------------------------------------------------------------|---------------------------------|---------------------------------------------------------------------|------------------------------|---------------|-----------------------------------------|-----------------------------------|
|                |                                            |                                              |               | full functional task<br>(2) Usual care included physical and occupational therapy which included active range of motion of bilateral upper extremities, stretching exercises in the upper extremity, hand-eye coordination activities, ambulation, and strengthening exercises for bilateral upper extremities |                                                        |                                                             |                                 | care was performed for 80 minutes, three times per week for 4 weeks | speed of performance         |               |                                         |                                   |
| Batchelor 2012 | Home-based multifactorial Falls prevention | Aiming to determine whether a multifactorial | Not specified | (1) Home-based multifactorial Falls                                                                                                                                                                                                                                                                            | A physiotherapist provided the home-based intervention | The home-based intervention was provided during home visits | The home-based intervention was | Not specified                                                       | Individualised home exercise | Not described | Adherence was assessed through exercise | (1) 75/85 completed the 12 months |

|               |                                                                       |                                                                                                                                                                                                    |               |                                                                                                                                                                                                                                                                                   |                                                                                          |                                                                     |                             |                                                                                        |                                             |               |                                                                                                                                |                                                                                                                                                                                             |
|---------------|-----------------------------------------------------------------------|----------------------------------------------------------------------------------------------------------------------------------------------------------------------------------------------------|---------------|-----------------------------------------------------------------------------------------------------------------------------------------------------------------------------------------------------------------------------------------------------------------------------------|------------------------------------------------------------------------------------------|---------------------------------------------------------------------|-----------------------------|----------------------------------------------------------------------------------------|---------------------------------------------|---------------|--------------------------------------------------------------------------------------------------------------------------------|---------------------------------------------------------------------------------------------------------------------------------------------------------------------------------------------|
|               | programme combined with usual care                                    | 1 falls prevention programme reduces falls in people with stroke at risk of recurrent falls and whether this programme leads to improvements in gait, balance, strength, and fall-related efficacy |               | prevention programme included home-based exercise programme which addressed balance and mobility problems, falls risk minimization strategies and injury risk minimization strategies<br>(2) Usual care including physical and occupational therapy was provided by professionals |                                                                                          |                                                                     | performed at patients' home |                                                                                        | programme was prescribed                    |               | diaries completed by participants and discussion with the physiotherapist at each review and following completion of the study | (2) Of the 64 intervention participants for whom falls data were available, 16 (25.0%) fully adhered, 36 (56.3%) partially adhered, and 12 (18.7%) did not adhere to the exercise programme |
| Chumbler 2012 | Multifaceted stroke telerehabilitation (STeleR) intervention combined | Aiming to determine whether a multifactorial falls prevention                                                                                                                                      | Not specified | (1) Home televisits were provided to demonstrate exercise                                                                                                                                                                                                                         | A physiotherapist or an occupational therapist provided tele-rehabilitation intervention | The home-based intervention was provided through telerehabilitation | At patients' home           | The STeleR intervention lasted 3 months which included 3 1-hour home tele-visits and 5 | The prescribed exercise was selected by the | Not described | An in-home messaging device (IHMD) was used to enhance                                                                         | (1) 22/25 completed the 3 months follow up<br>(2) 24/25                                                                                                                                     |

|  |                 |                                                                                                                                                                                 |  |                                                                                                                                                                                                                                                                                                                           |  |  |  |                              |                                                            |  |                    |                                  |
|--|-----------------|---------------------------------------------------------------------------------------------------------------------------------------------------------------------------------|--|---------------------------------------------------------------------------------------------------------------------------------------------------------------------------------------------------------------------------------------------------------------------------------------------------------------------------|--|--|--|------------------------------|------------------------------------------------------------|--|--------------------|----------------------------------|
|  | with usual care | programme reduces falls in people with stroke at risk of recurrent falls and whether this programme leads to improvements in gait, balance, strength, and fall-related efficacy |  | which focused on strength and balance, to develop a treatment plan which might include modification of home environment and application of new adaptive equipment or techniques, to solve interval problems<br>(2) Telephone intervention was provided to review current exercise regimen and assistive technology and to |  |  |  | telephone intervention calls | therapist based on patients' physical performance measures |  | exercise adherence | completed the 6 months follow up |
|--|-----------------|---------------------------------------------------------------------------------------------------------------------------------------------------------------------------------|--|---------------------------------------------------------------------------------------------------------------------------------------------------------------------------------------------------------------------------------------------------------------------------------------------------------------------------|--|--|--|------------------------------|------------------------------------------------------------|--|--------------------|----------------------------------|

|           |                                                          |                                                                                                                                                                    |               |                                                                                                                                                                                                                                                                                                                      |                                                                |                                                             |                   |               |                                                                                                          |               |               |                                       |
|-----------|----------------------------------------------------------|--------------------------------------------------------------------------------------------------------------------------------------------------------------------|---------------|----------------------------------------------------------------------------------------------------------------------------------------------------------------------------------------------------------------------------------------------------------------------------------------------------------------------|----------------------------------------------------------------|-------------------------------------------------------------|-------------------|---------------|----------------------------------------------------------------------------------------------------------|---------------|---------------|---------------------------------------|
|           |                                                          |                                                                                                                                                                    |               | reassess and advance the exercise program<br>(3) Routine Veterans Affairs (VA) care was provided                                                                                                                                                                                                                     |                                                                |                                                             |                   |               |                                                                                                          |               |               |                                       |
| Corr 1995 | Home-based occupational therapy combined with usual care | Aiming to evaluate the influence of continued rehabilitative intervention by an occupational therapist on stroke patients after their discharge from a stroke unit | Not specified | (1) The home-based intervention including teaching new skills; facilitating more independence in activities of daily living; facilitating return of function; enabling patients to use equipment supplied by other agencies, was provided by an occupational therapist during home visits<br>(2) Any other follow up | An occupational therapist provided the home-based intervention | The home-based intervention was provided during home visits | At patients' home | Not specified | Appropriate therapeutic interventions were carried out as needed, based on the model of human occupation | Not described | Not described | 46/55 completed the 1 year assessment |

|                 |                                                           |                                                                                                                                                          |               |                                                                                                                                                                                                                                                                                                                                                                                                        |                                                                |                                                             |                   |                                                                                                 |                                                                                                 |               |               |                                                                                           |
|-----------------|-----------------------------------------------------------|----------------------------------------------------------------------------------------------------------------------------------------------------------|---------------|--------------------------------------------------------------------------------------------------------------------------------------------------------------------------------------------------------------------------------------------------------------------------------------------------------------------------------------------------------------------------------------------------------|----------------------------------------------------------------|-------------------------------------------------------------|-------------------|-------------------------------------------------------------------------------------------------|-------------------------------------------------------------------------------------------------|---------------|---------------|-------------------------------------------------------------------------------------------|
|                 |                                                           |                                                                                                                                                          |               | services such as day-hospital attendance and community physiotherapy were provided                                                                                                                                                                                                                                                                                                                     |                                                                |                                                             |                   |                                                                                                 |                                                                                                 |               |               |                                                                                           |
| Gilbertson 2000 | Domiciliary occupational therapy combined with usual care | Aiming to establish if a brief programme of domiciliary occupational therapy could improve the recovery of patients with stroke discharged from hospital | Not specified | (1) Home-based intervention which was tailored to recovery ability of self-care or domestic or leisure activities<br>(2) Routine services included inpatient multidisciplinary rehabilitation, a pre-discharge home visit for selected patients, the provision of support services and equipment, regular multidisciplinary review at a stroke clinic, and selected patients referred to a medical day | An occupational therapist provided the home-based intervention | The home-based intervention was provided during home visits | At patients' home | The home-based intervention was provided for 6 weeks for around 10 visits lasting 30-45 minutes | The home-based intervention was developed tailored to recovery goals identified by the patients | Not described | Not described | (1) 64/67 completed the 8 weeks assessment<br>(2) 60/67 completed the 6 months assessment |

|                   |                                                                    |                                                                                                                                                                                                                                           |                                                                            |                                                                                                                                                                                                                                                      |                                                                                              |                                                             |                   |                                                                                              |                                              |               |                                                                     |                                             |
|-------------------|--------------------------------------------------------------------|-------------------------------------------------------------------------------------------------------------------------------------------------------------------------------------------------------------------------------------------|----------------------------------------------------------------------------|------------------------------------------------------------------------------------------------------------------------------------------------------------------------------------------------------------------------------------------------------|----------------------------------------------------------------------------------------------|-------------------------------------------------------------|-------------------|----------------------------------------------------------------------------------------------|----------------------------------------------|---------------|---------------------------------------------------------------------|---------------------------------------------|
|                   |                                                                    |                                                                                                                                                                                                                                           |                                                                            | hospital                                                                                                                                                                                                                                             |                                                                                              |                                                             |                   |                                                                                              |                                              |               |                                                                     |                                             |
| Goldberg<br>1997  | Home-based, case-managed care combined with usual care             | Aiming to develop a systematic follow-up program for stroke survivors and their caregivers during the first year after discharge from inpatient rehabilitation, and to test a new model of delivery of health services to this population | A stroke educational manual with associated printed materials was provided | (1) Home-based intervention included therapeutic recreation, social work, and psychology consultation<br>(2) Standard outpatient follow-up services included routine medical follow-up visits and, when indicated, outpatient rehabilitation service | A physiatrist, psychologist, and recreational therapist provided the home-based intervention | The home-based intervention was provided during home visits | At patients' home | The home-based intervention was provided bimonthly for hour-long                             | Not described                                | Not described | Not described                                                       | 21/27 completed the 1 year assessment       |
| Mandigout<br>2021 | Individualized home-based coaching program combine with usual care | Aiming to investigate whether an individualised home coaching program improved walking capacity (at 6                                                                                                                                     | Not specified                                                              | (1) The treatment strategy of home-based intervention was not specified<br>(2) Usual care which might                                                                                                                                                | A therapist provided the home-based intervention                                             | The home-based intervention was provided during home visits | At patients' home | The home-based intervention was provided through home visits once every 3 weeks for 6 months | Individualized coaching program was provided | Not described | An activity tracker was used to monitor physical activities at home | 39/42 completed the home-based intervention |

|              |                                                       |                                                                                                                                                                                                                                                                                         |               |                                                                                                                                                                                                                                                                       |                                                                                                                      |                                                             |                   |               |               |               |               |                                         |
|--------------|-------------------------------------------------------|-----------------------------------------------------------------------------------------------------------------------------------------------------------------------------------------------------------------------------------------------------------------------------------------|---------------|-----------------------------------------------------------------------------------------------------------------------------------------------------------------------------------------------------------------------------------------------------------------------|----------------------------------------------------------------------------------------------------------------------|-------------------------------------------------------------|-------------------|---------------|---------------|---------------|---------------|-----------------------------------------|
|              |                                                       | months) and promoted long-term benefits (at 12 months) in subacute post-stroke patients                                                                                                                                                                                                 |               | include outpatient therapy, medical appointment                                                                                                                                                                                                                       |                                                                                                                      |                                                             |                   |               |               |               |               |                                         |
| Ricauda 2004 | Home hospitalization service combined with usual care | Aiming to evaluate whether home-treated patients have different mortality rates from those of patients admitted to and treated on a general medical ward (GMW), and to evaluate residual functional impairment, neurological deficit, depression, morbidity, and admission to long-term | Not specified | (1) The home-based intervention emphasized a task- and context-oriented approach, which recommended that the patient perform guided, supervised, and self-directed activities in a functional and familiar context<br><br>(2) Routine hospital rehabilitation service | Physiotherapists, speech therapists, occupational therapists and psychologists, provided the home-based intervention | The home-based intervention was provided during home visits | At patients' home | Not specified | Not described | Not described | Not described | 39/60 completed the 6 months assessment |

|           |                                                                                                |                                                                                                                                                  |               |                                                                                                                                                                                            |                                                      |                                                             |                   |                                                                                             |                                                    |               |               |                                                                               |
|-----------|------------------------------------------------------------------------------------------------|--------------------------------------------------------------------------------------------------------------------------------------------------|---------------|--------------------------------------------------------------------------------------------------------------------------------------------------------------------------------------------|------------------------------------------------------|-------------------------------------------------------------|-------------------|---------------------------------------------------------------------------------------------|----------------------------------------------------|---------------|---------------|-------------------------------------------------------------------------------|
|           |                                                                                                | facilities in the two groups of patients                                                                                                         |               |                                                                                                                                                                                            |                                                      |                                                             |                   |                                                                                             |                                                    |               |               |                                                                               |
| Rudd 1997 | Early discharge with home rehabilitation combined with usual care                              | Aiming to assess the clinical effectiveness of an early discharge policy for patients with stroke by using a community-based rehabilitation team | Not specified | (1) Home-based intervention included physiotherapy, occupational therapy and speech therapy<br>(2) Conventional care included inpatient treatment, discharge planning, and outpatient care | Therapists provided the home-based intervention      | The home-based intervention was provided during home visits | At patients' home | The home-based intervention was provided for maximum once a day, for up to 3 months         | Individual care plan was provided for each patient | Not described | Not described | 136/167 completed the 12 months assessment                                    |
| Wong 2015 | 4-week transitional care programme (TCP) with home-based intervention combined with usual care | Aiming to test the effects of a transitional care model with a specified dose of intervention                                                    | Not specified | (1) TCP included home-based intervention consisting of management and prevention of stroke                                                                                                 | A trained nurse provided the home-based intervention | The home-based intervention was provided during home visits | At patients' home | (1) Home-based intervention was provided three days per week for 4 weeks<br>(2) The routine | Not described                                      | Not described | Not described | (1) 47/54 completed the 4 weeks assessment<br>(2) 45/54 completed the 8 weeks |



|  |  |  |  |                                                                                                                                                                                                                                                                                                                                               |  |  |  |                                                                                                                 |  |  |  |                   |
|--|--|--|--|-----------------------------------------------------------------------------------------------------------------------------------------------------------------------------------------------------------------------------------------------------------------------------------------------------------------------------------------------|--|--|--|-----------------------------------------------------------------------------------------------------------------|--|--|--|-------------------|
|  |  |  |  | <p>recurrence; symptoms assessment and management; enhancing physical function: self-care abilities and exercise; healthy behaviour: adherence to medication and diet; building resilience: connections with the self, family, social life and a Higher Being; and emotion management</p> <p>(2) routine hospital-based physical training</p> |  |  |  | <p>hospital-based physical training programme was offered within the first 3 weeks after hospital discharge</p> |  |  |  | <p>assessment</p> |
|--|--|--|--|-----------------------------------------------------------------------------------------------------------------------------------------------------------------------------------------------------------------------------------------------------------------------------------------------------------------------------------------------|--|--|--|-----------------------------------------------------------------------------------------------------------------|--|--|--|-------------------|

|          |                                       |                                                                                                                                                            |               |                                                                                                                                                                                                        |                                                                      |                                                             |                   |                                                                                                                                       |                                                                              |               |               |                                            |               |
|----------|---------------------------------------|------------------------------------------------------------------------------------------------------------------------------------------------------------|---------------|--------------------------------------------------------------------------------------------------------------------------------------------------------------------------------------------------------|----------------------------------------------------------------------|-------------------------------------------------------------|-------------------|---------------------------------------------------------------------------------------------------------------------------------------|------------------------------------------------------------------------------|---------------|---------------|--------------------------------------------|---------------|
|          |                                       |                                                                                                                                                            |               | programme was provided                                                                                                                                                                                 |                                                                      |                                                             |                   |                                                                                                                                       |                                                                              |               |               |                                            |               |
| Koç 2015 | Home-based exercise                   | Aiming to assess the efficiency of structured home-based exercises for patients with subacute ischemic stroke in terms of their activities of daily living | Not specified | Home-based intervention including stretching and flexibility exercises, assistive and resistive exercises, active-assisted range of motion exercises, and progressive walking programme and relaxation | A nurse provided the home-based intervention                         | The home-based intervention was provided during home visits | At patients' home | Home-based intervention was provided twice a week for 12 weeks, with each treatment session lasting 1 hour                            | Not described                                                                | Not described | Not described | Not described                              | Not described |
| Lin 2004 | Home-based physical therapy programme | Aiming to examine the effects of low-intensity home-based physical therapy on the performance of ADL and motor                                             | Not specified | Home-based intervention mainly consisted of motor facilitation, postural control training, functional ambulation training with                                                                         | One of four physical therapists provided the home-based intervention | The home-based intervention was provided during home visits | At patients' home | Home-based intervention was provided once a week for 10 consecutive weeks, with each treatment session lasting about 50 to 60 minutes | Daily exercise programmes were tailor-made to the patients' individual needs | Not described | Not described | 9/10 completed the home-based intervention |               |

|             |                                       |                                                                                                                                                 |               |                                                                                                                                                                                                                   |                                                                |                                                             |                   |                                                   |               |               |               |                                         |
|-------------|---------------------------------------|-------------------------------------------------------------------------------------------------------------------------------------------------|---------------|-------------------------------------------------------------------------------------------------------------------------------------------------------------------------------------------------------------------|----------------------------------------------------------------|-------------------------------------------------------------|-------------------|---------------------------------------------------|---------------|---------------|---------------|-----------------------------------------|
|             |                                       | function in patients more than 1 year after stroke                                                                                              |               | gait correction, and ADL training                                                                                                                                                                                 |                                                                |                                                             |                   |                                                   |               |               |               |                                         |
| Wade 1992   | Home-based physiotherapy intervention | Aiming to determine whether the home-based intervention of a physiotherapist improved mobility in patients seen more than one year after stroke | Not specified | Home-based intervention included exercises to improve the walking and balance and ADL practice                                                                                                                    | A physiotherapist provided the home-based intervention         | The home-based intervention was provided during home visits | At patients' home | Home-based intervention was provided for 3 months | Not described | Not described | Not described | 48/49 completed the 3 months assessment |
| Walker 1996 | Home-based dressing practice          | Aiming to investigate the intensive treatment for patients with persistent dressing problems at six months after discharge from hospital        | Not specified | Home-based intervention involved teaching patients and carers appropriate techniques such as dressing the affected limb first, energy conservation, the use of red thread to overcome perceptual difficulties and | An occupational therapist provided the home-based intervention | The home-based intervention was provided during home visits | At patients' home | Home-based intervention was provided for 3 months | Not described | Not described | Not described | Not described                           |

|           |                                                   |                                                                                                                                                         |                                                                                                                      |                                                                                                                                                                                                                                                                                                                                                                                  |                                                                                                                                                                                                                |                                                                                                                                                |                   |                                                                                                                                                                                                                                                              |                                                                |               |                                                                                                                                                                                                                                                                            |                                             |
|-----------|---------------------------------------------------|---------------------------------------------------------------------------------------------------------------------------------------------------------|----------------------------------------------------------------------------------------------------------------------|----------------------------------------------------------------------------------------------------------------------------------------------------------------------------------------------------------------------------------------------------------------------------------------------------------------------------------------------------------------------------------|----------------------------------------------------------------------------------------------------------------------------------------------------------------------------------------------------------------|------------------------------------------------------------------------------------------------------------------------------------------------|-------------------|--------------------------------------------------------------------------------------------------------------------------------------------------------------------------------------------------------------------------------------------------------------|----------------------------------------------------------------|---------------|----------------------------------------------------------------------------------------------------------------------------------------------------------------------------------------------------------------------------------------------------------------------------|---------------------------------------------|
|           |                                                   |                                                                                                                                                         |                                                                                                                      | to mark alignment of buttons, and advice on choice of clothing                                                                                                                                                                                                                                                                                                                   |                                                                                                                                                                                                                |                                                                                                                                                |                   |                                                                                                                                                                                                                                                              |                                                                |               |                                                                                                                                                                                                                                                                            |                                             |
| Wang 2015 | Caregiver-mediated, home-based intervention (CHI) | Aiming to examine whether CHI based on the ICF conceptual framework was effective in improving the physical functioning of patients with chronic stroke | Individualized training guidelines and simple illustrations were provided by a physical therapist for the caregivers | Home intervention was designed to improve patients' body functions and structural components; to improve patients' ability to undertake everyday activities within their living environments using task-specific restorative and compensatory training methods; and to help the patients reintegrate into the society by participating in restorative outdoor leisure activities | (1) A physical therapist prescribed the home-based intervention and taught home-based intervention to patients and their caregivers<br>(2) Patients and their caregivers performed the home-based intervention | (1) The teaching of the home-based intervention was provided during home<br>(2) The home-based intervention was provided by caregivers at home | At patients' home | (1) The teaching of the home-based intervention was provided once a week for 12 weeks with each session lasting approximately 90 minutes<br>(2) The home-based intervention was encouraged to be performed at least twice a week and, if possible, every day | A personalized training schedule was provided for each patient | Not described | Caregivers was requested to record the frequency of training and tasks completed each week, and during the home visits, the physical therapist examined the activities practiced, the frequency of practice, and the overall progress of the patient during the past week. | 25/25 completed the home-based intervention |
